# Supplementary material for: Analysis of spontaneous labor progression of breech presentation at term
Source: PubMed Central journal article supplement (PMC8920216; doi:10.1371/journal.pone.0262002), 2022-03-14
Supplement: pone.0262002.s002.pdf [file pone.0262002.s002.pdf]

| 3 cm     | 4 cm     | 5 cm     | 6 cm     | 7 cm     | 8 cm     | 9 cm     |
|----------|----------|----------|----------|----------|----------|----------|
| 7:15 PM  |          | 9:00 PM  |          |          | 10:00 PM |          |
|          |          |          |          | 12:15 AM | 1:15 AM  |          |
|          | 3:15 AM  |          |          | 3:45 AM  |          |          |
| 8:00 AM  |          |          |          | 9:00 AM  | 10:30 AM |          |
|          | 5:00 PM  |          |          | 6:00 PM  |          |          |
|          | 5:00 PM  |          | 7:00 PM  |          |          | 8:00 PM  |
| 4:00 AM  | 4:45 AM  |          | 6:00 AM  | 7:00 AM  | 8:45 AM  | 9:00 AM  |
|          |          |          |          | 1:00 PM  |          |          |
| 6:45 AM  |          | 8:15 AM  |          | 9:15 AM  | 9:45 AM  | 10:15 AM |
| 4:00 AM  |          | 5:00 AM  | 6:00 AM  |          |          | 7:00 AM  |
|          |          | 10:00 AM |          |          |          |          |
| 10:15 PM | 10:30 PM | 11:30 PM |          | 12:15 AM |          | 12:45 AM |
|          | 2:00 AM  |          | 3:00 AM  |          | 4:00 AM  | 4:45 AM  |
|          |          |          | 12:10 PM | 1:15 PM  | 2:30 PM  | 3:30 PM  |
|          |          |          |          |          | 4:00 AM  |          |
|          | 10:30 PM |          |          |          |          | 11:45 PM |
| 3:20 AM  | 4:45 AM  | 5:05 AM  |          |          | 6:10 AM  |          |
| 12:15 AM |          |          |          |          |          | 1:15 AM  |
| 11:20 PM |          | 12:45 AM | 1:45 AM  | 4:45 AM  | 5:15 AM  |          |
|          |          | 4:00 PM  |          | 5:00 PM  |          |          |
|          |          |          |          |          |          | 1:00 AM  |
| 6:20 AM  |          |          |          | 7:20 AM  |          | 10:15 AM |
|          | 3:00 AM  |          |          | 3:45 AM  |          |          |
|          |          |          |          | 6:00 AM  | 6:30 AM  |          |
|          |          | 2:30 AM  |          |          | 3:30 AM  | 4:30 AM  |
| 12:30 AM | 1:15 AM  |          | 2:15 AM  |          | 3:15 AM  |          |
| 11:30 PM |          | 12:30 AM |          |          |          | 1:15 AM  |
|          | 3:00 AM  |          |          | 4:00 AM  |          | 5:00 AM  |
| 8:30 PM  |          |          |          |          | 9:30 PM  |          |
|          | 10:15 AM | 11:15 AM |          |          |          |          |
|          |          |          |          | 6:15 AM  |          | 6:45 AM  |
| 9:45 AM  |          |          |          |          | 11:00 AM | 11:45 AM |
| 12:30 AM |          |          |          |          |          | 1:45 AM  |
| 7:00 PM  |          | 8:00 PM  | 9:00 PM  |          | 10:00 PM |          |
| 11:30 AM |          |          | 12:30 PM |          |          | 1:30 PM  |
|          |          |          | 4:15 PM  |          | 5:15 PM  |          |
|          |          | 6:30 AM  |          | 7:30 AM  |          |          |
| 9:00 AM  | 10:15 AM | 11:15 AM | 12:15 PM |          | 1:15 PM  |          |
| 11:00 AM |          | 12:00 PM |          |          | 1:00 PM  |          |
| 8:45 PM  | 9:45 PM  | 10:45 PM |          |          | 11:00 PM |          |
|          |          |          |          |          | 12:45 AM |          |
|          |          |          |          |          | 5:15 PM  |          |

|          |          |          |          |          |          |          |
|----------|----------|----------|----------|----------|----------|----------|
|          | 8:00 PM  |          | 8:30 PM  |          | 9:00 PM  |          |
|          | 7:45 PM  |          |          |          | 8:15 PM  | 8:45 PM  |
|          | 6:15 PM  |          | 7:15 PM  |          |          | 8:15 PM  |
|          |          | 8:00 AM  |          |          |          |          |
|          | 10:45 PM |          |          |          |          | 11:15 PM |
| 11:00 PM | 12:30 AM | 1:00 AM  |          | 1:15 AM  |          |          |
|          |          |          |          | 8:30 AM  | 9:30 AM  | 10:30 AM |
| 3:45 AM  | 4:45 AM  | 6:30 AM  |          | 7:30 AM  |          |          |
| 2:30 AM  |          |          |          |          |          |          |
| 6:15 AM  | 8:15 AM  |          | 10:00 AM |          |          |          |
| 9:30 AM  |          | 11:00 AM |          |          |          |          |
| 10:00 PM |          |          |          |          | 11:00 PM | 12:00 AM |
| 3:00 PM  | 4:45 PM  |          | 5:45 PM  |          | 6:45 PM  | 8:00 PM  |
|          | 7:00 PM  |          | 8:00 PM  |          |          |          |
| 1:30 AM  |          | 2:45 AM  |          |          |          |          |
| 6:30 AM  |          | 8:00 AM  |          |          |          |          |
| 9:00 AM  |          | 9:45 AM  |          |          |          |          |
|          |          | 1:45 PM  |          |          | 2:45 PM  |          |
| 12:00 AM | 1:00 AM  |          |          |          | 3:00 AM  | 3:30 AM  |
|          |          |          | 1:30 AM  |          |          | 2:15 AM  |
| 8:30 AM  | 9:30 AM  | 10:30 AM |          |          | 11:30 AM |          |
| 12:30 PM |          |          | 1:30 PM  | 2:30 PM  |          |          |
| 12:00 PM |          | 1:00 PM  | 2:00 PM  | 3:00 PM  | 4:00 PM  |          |
|          | 1:15 AM  |          |          | 2:15 AM  | 3:15 AM  |          |
|          |          | 4:30 AM  | 5:30 AM  |          |          | 6:00 AM  |
| 11:15 PM |          |          | 12:30 AM |          |          |          |
|          | 8:30 PM  |          |          | 9:15 PM  |          |          |
|          | 11:15 PM |          |          | 12:15 AM |          | 1:15 AM  |
| 4:15 AM  |          | 5:45 AM  | 6:45 AM  |          | 7:50 AM  | 9:00 AM  |
| 10:30 AM |          | 11:45 AM |          |          |          |          |
|          |          |          |          |          | 4:30 AM  |          |
| 1:15 AM  |          |          | 2:05 AM  |          | 3:15 AM  |          |
| 3:30 AM  | 4:30 AM  | 5:30 AM  |          | 6:30 AM  |          | 7:45 AM  |
| 1:30 PM  | 2:15 PM  | 3:45 PM  | 5:00 PM  | 6:00 PM  | 8:00 PM  | 9:00 PM  |
|          |          |          |          |          |          | 3:30 AM  |
|          | 8:15 PM  | 9:00 PM  |          |          |          |          |
| 9:15 AM  | 10:15 AM | 11:30 AM |          |          |          | 12:45 PM |
|          |          | 9:30 PM  |          | 10:30 PM |          |          |
|          |          |          |          |          | 8:15 PM  |          |
| 10:05 PM | 10:25 PM |          |          |          |          | 10:45 PM |
|          | 6:45 AM  |          | 7:50 AM  |          | 8:45 AM  | 10:45 AM |
| 1:00 PM  | 2:00 PM  |          |          | 3:00 PM  |          |          |

|          |          |          |          |          |          |          |
|----------|----------|----------|----------|----------|----------|----------|
|          |          |          | 12:45 AM |          |          | 12:50 AM |
| 1:45 AM  | 2:45 AM  |          |          |          |          |          |
|          | 9:30 PM  |          |          | 10:30 PM |          |          |
|          | 2:30 PM  | 3:45 PM  | 5:00 PM  | 6:45 PM  |          |          |
| 1:00 AM  | 2:00 AM  | 3:00 AM  |          |          |          |          |
| 4:00 AM  |          |          |          | 5:00 AM  | 6:00 AM  | 7:00 AM  |
|          | 9:00 PM  |          |          |          | 9:10 PM  |          |
| 4:00 AM  | 5:15 AM  | 6:15 AM  | 6:45 AM  | 7:45 AM  | 8:45 AM  |          |
|          | 3:30 PM  | 4:30 PM  | 5:45 PM  |          | 6:45 PM  | 7:45 PM  |
|          |          | 2:00 AM  |          |          |          | 3:30 AM  |
|          |          | 6:00 PM  | 7:00 PM  | 8:00 PM  |          |          |
|          | 4:40 PM  | 6:00 PM  |          | 7:15 PM  |          | 8:15 PM  |
|          | 9:00 AM  |          |          |          | 10:00 AM |          |
| 12:00 PM |          |          |          | 1:30 PM  |          |          |
| 2:30 AM  | 3:30 AM  |          | 4:30 AM  |          |          |          |
|          |          | 12:45 PM |          |          | 1:30 PM  |          |
| 10:15 PM | 11:30 PM | 12:30 AM | 12:40 AM | 1:10 AM  |          |          |
| 7:00 AM  |          |          |          |          |          | 8:00 AM  |
|          |          |          | 5:00 AM  |          | 6:00 AM  |          |
|          | 12:30 PM | 1:30 PM  | 2:00 PM  | 3:00 PM  | 4:45 PM  |          |
| 11:00 PM |          | 12:00 AM |          |          |          |          |
|          | 9:00 PM  | 10:00 PM | 11:00 PM | 12:00 AM |          | 1:00 AM  |
|          | 4:05 AM  | 6:00 AM  | 7:45 AM  | 8:45 AM  | 9:45 AM  | 10:45 AM |
| 4:00 PM  |          |          |          |          | 4:45 PM  |          |
|          |          | 4:00 AM  |          |          |          |          |
|          |          |          | 7:15 PM  | 8:15 PM  |          | 9:15 PM  |
|          |          | 1:30 AM  |          |          |          |          |
|          | 8:00 AM  |          | 9:00 AM  |          |          | 10:00 AM |
| 2:45 AM  |          | 4:00 AM  |          |          |          |          |
| 6:00 PM  | 7:00 PM  | 8:15 PM  |          | 9:15 PM  |          |          |
|          | 11:15 PM |          |          |          |          |          |
|          | 4:00 AM  | 4:40 AM  |          |          | 5:15 AM  |          |
|          | 13h50    |          |          |          |          |          |
|          |          |          |          |          | 7:00 PM  |          |
| 3:00 AM  |          | 4:00 AM  |          |          | 5:00 AM  |          |
|          | 1:30 PM  | 2:30 PM  |          | 3:30 PM  |          |          |
|          | 8:15 PM  |          |          | 9:40 PM  |          |          |
| 6:00 PM  | 7:00 PM  | 8:00 PM  | 9:00 PM  |          |          |          |
| 5:30 AM  |          |          |          |          |          |          |
| 4:30 PM  |          |          | 5:30 PM  | 6:30 PM  | 8:00 PM  | 9:00 PM  |
|          |          | 3:15 PM  | 4:15 PM  |          | 4:35 PM  |          |
|          | 10:00 AM |          | 11:00 AM | 11:30 AM |          | 12:30 PM |
|          |          | 8:00 AM  | 9:30 AM  |          |          |          |

|          |          |          |          |          |          |          |
|----------|----------|----------|----------|----------|----------|----------|
|          |          | 7:00 AM  | 8:00 AM  |          | 9:00 AM  | 10:00 AM |
| 10:15 PM |          |          |          |          | 11:45 PM |          |
|          |          | 6:00 AM  |          | 7:00 AM  |          |          |
| 9:00 PM  |          |          | 10:15 PM |          |          | 11:09 PM |
| 11:00 AM |          | 12:30 PM |          |          | 1:30 PM  |          |
| 8:00 AM  | 9:30 AM  |          | 10:40 AM |          |          |          |
| 5:00 PM  | 6:00 PM  | 7:00 PM  |          |          |          |          |
| 11:00 AM |          | 12:00 PM | 1:15 PM  | 2:00 PM  | 3:00 PM  | 3:45 PM  |
| 12:00 PM |          |          | 1:15 PM  |          |          | 2:30 PM  |
| 6:00 PM  |          | 7:45 PM  |          | 9:00 PM  |          | 10:20 PM |
|          | 3:15 AM  |          | 4:45 AM  |          |          | 6:00 AM  |
|          |          |          | 11:30 AM |          |          | 12:30 PM |
|          |          | 2:00 PM  | 3:00 PM  |          |          | 3:45 PM  |
|          | 1:30 PM  |          | 2:45 PM  |          |          |          |
| 3:30 AM  |          |          |          | 5:00 AM  |          |          |
| 11:00 AM | 11:40 AM |          | 12:45 PM |          | 1:15 PM  | 1:30 PM  |
|          |          | 3:30 AM  |          | 4:30 AM  |          |          |
|          |          | 11:00 AM |          |          |          | 12:15 PM |
|          |          |          | 8:00 PM  |          | 9:30 PM  | 10:45 PM |
| 5:30 AM  | 7:00 AM  | 8:00 AM  | 9:00 AM  |          |          | 10:00 AM |
|          | 4:30 AM  |          |          |          |          | 5:45 AM  |
|          |          |          |          |          | 4:15 PM  |          |
| 1:00 PM  |          | 2:00 PM  |          |          | 3:00 PM  | 5:00 PM  |
|          |          | 4:00 AM  | 5:00 AM  |          | 6:00 AM  | 7:00 AM  |
| 3:00 AM  | 5:00 AM  |          | 6:00 AM  | 7:00 AM  |          |          |
| 6:30 AM  | 8:00 AM  | 9:15 AM  | 10:15 AM |          |          | 11:10 AM |
|          |          |          |          |          |          | 10:15 AM |
| 10:45 PM |          |          |          |          |          |          |
|          |          | 1:15 PM  | 2:15 PM  |          | 3:20 PM  | 4:15 PM  |
|          | 3:30 AM  |          | 4:30 AM  |          | 5:30 AM  |          |
|          |          | 5:15 PM  |          |          | 5:45 PM  |          |
|          | 4:00 AM  |          | 5:45 AM  | 6:45 AM  |          | 8:00 AM  |
| 9:30 PM  |          |          |          | 11:00 PM |          |          |
|          |          | 10:30 AM |          |          | 11:30 AM |          |
|          |          |          |          |          | 7:15 AM  |          |
|          |          | 4:45 AM  |          |          |          |          |
| 4:00 AM  | 5:20 AM  | 6:30 AM  | 7:30 AM  | 8:30 AM  | 9:30 AM  |          |
| 3:00 AM  | 4:00 AM  | 6:30 AM  | 7:00 AM  | 8:00 AM  |          | 8:20 AM  |
| 8:30 AM  |          | 10:00 AM | 11:00 AM | 12:00 PM | 1:00 PM  |          |
| 3:00 PM  | 4:30 PM  | 5:30 PM  |          | 6:30 PM  |          |          |
| 9:30 AM  |          | 11:00 AM |          |          | 12:15 PM | 1:15 PM  |
| 4:00 AM  | 5:00 AM  |          |          |          |          | 5:45 AM  |
|          | 2:00 AM  |          | 3:00 AM  | 4:00 AM  |          |          |

|          |          |          |          |          |          |          |
|----------|----------|----------|----------|----------|----------|----------|
| 8:30 PM  | 9:15 PM  |          | 10:30 PM | 11:15 PM |          |          |
| 8:15 PM  |          |          |          |          |          | 9:30 PM  |
| 3:45 AM  | 5:15 AM  | 7:15 AM  |          |          | 7:45 AM  |          |
|          | 6:30 AM  |          |          | 7:30 AM  | 8:30 AM  |          |
| 10:00 AM | 10:45 AM | 11:50 AM |          | 2:00 PM  |          | 3:00 PM  |
| 9:30 PM  |          | 10:45 PM | 11:45 PM | 12:30 AM | 1:30 AM  |          |
| 3:30 PM  |          | 4:15 PM  | 4:30 PM  |          | 4:45 PM  | 5:05 PM  |
|          |          |          | 10:15 PM |          |          |          |
| 2:45 AM  |          | 3:45 AM  |          | 5:00 AM  |          |          |
|          |          | 9:30 AM  |          | 11:00 AM | 12:00 PM | 1:00 PM  |
|          |          |          |          | 5:00 AM  |          |          |
|          |          |          |          |          | 4:00 AM  | 5:30 AM  |
| 2:30 AM  |          |          |          |          | 3:30 AM  |          |
| 10:45 PM | 11:30 PM | 12:45 AM | 1:50 AM  |          |          |          |
| 2:20 PM  |          | 4:00 PM  | 5:00 PM  | 6:10 PM  | 7:15 PM  |          |
| 8:00 PM  | 9:05 PM  |          |          | 11:05 PM |          |          |
| 2:15 AM  |          |          |          |          |          |          |
|          |          |          |          |          | 12:40 PM |          |
| 5:30 AM  |          |          |          |          |          | 6:15 AM  |
|          | 9:15 AM  | 10:45 AM |          | 11:45 AM | 12:45 PM | 1:45 PM  |
| 1:15 AM  |          |          | 2:15 AM  |          |          | 2:45 AM  |
|          | 5:00 PM  |          | 6:00 PM  | 7:00 PM  |          | 8:15 PM  |
|          | 2:30 AM  | 3:15 AM  |          |          |          |          |
|          |          | 12:15 PM | 1:15 PM  |          |          |          |
| 7:00 AM  | 8:15 AM  | 9:15 AM  | 10:15 AM | 11:15 AM | 12:20 PM | 12:40 PM |
| 8:45 PM  |          |          |          |          | 11:15 PM |          |
| 9:15 PM  |          |          |          |          |          | 10:15 PM |
|          |          | 2:30 PM  |          | 4:00 PM  |          | 5:00 PM  |
|          |          | 11:00 AM | 12:00 PM | 1:00 PM  | 2:00 PM  | 3:00 PM  |
| 8:15 PM  |          | 9:30 PM  | 10:30 PM |          |          |          |
| 9:00 PM  | 10:10 PM | 11:15 PM | 12:15 AM |          | 1:15 AM  |          |
| 10:30 AM |          |          | 10:45 AM |          |          |          |
| 1:45 PM  | 3:15 PM  | 4:30 PM  |          |          | 5:35 PM  | 6:35 PM  |
| 11:15 PM | 12:15 AM |          | 1:30 AM  |          |          |          |
|          |          |          |          |          |          | 12:30 AM |
|          |          | 2:15 AM  |          | 3:15 AM  | 4:15 AM  |          |
|          | 3:30 PM  | 4:45 PM  |          | 5:45 PM  | 6:45 PM  | 7:45 PM  |
| 9:00 PM  |          |          |          |          |          |          |
| 6:30 AM  | 7:30 AM  | 8:00 AM  |          |          | 8:50 AM  |          |
| 12:15 AM |          | 2:15 AM  | 3:15 AM  | 5:15 AM  | 7:45 AM  |          |
|          |          |          |          | 8:30 AM  | 9:30 AM  | 11:30 AM |
|          |          |          | 1:45 PM  |          |          |          |
|          | 2:30 AM  |          |          | 3:15 AM  |          |          |

|          |          |          |          |          |          |          |
|----------|----------|----------|----------|----------|----------|----------|
|          | 9:45 PM  |          | 11:45 PM | 1:15 AM  | 2:15 AM  | 3:30 AM  |
|          | 6:30 AM  | 8:00 AM  |          | 9:00 AM  | 10:15 AM |          |
| 2:45 PM  | 4:00 PM  | 6:10 PM  | 8:10 PM  | 9:45 PM  |          |          |
|          | 12:45 PM |          |          |          |          |          |
| 4:00 AM  |          | 5:30 AM  |          | 6:45 AM  |          |          |
| 2:45 AM  |          | 4:00 AM  |          |          |          |          |
|          | 2:30 PM  | 4:45 PM  | 6:00 PM  | 7:00 PM  |          | 8:00 PM  |
| 5:30 AM  |          |          | 6:30 AM  |          | 7:30 AM  | 8:30 AM  |
| 6:45 PM  |          |          | 7:45 PM  |          |          | 8:45 PM  |
| 9:00 PM  |          | 10:15 PM |          | 11:15 PM |          | 12:30 AM |
| 8:30 PM  |          | 9:45 PM  |          | 10:45 PM |          |          |
| 9:45 AM  | 10:50 AM | 12:00 PM | 1:00 PM  | 2:00 PM  |          | 3:00 PM  |
| 9:45 PM  |          |          |          |          |          | 10:45 PM |
| 12:00 AM |          |          |          |          |          |          |
| 4:45 AM  |          |          |          | 5:45 AM  |          |          |
| 2:15 AM  |          |          | 3:30 AM  | 4:30 AM  |          | 7:00 AM  |
|          |          | 5:35 AM  |          | 6:15 AM  | 7:15 AM  | 8:30 AM  |
| 6:15 AM  |          |          |          |          |          |          |
|          |          |          | 11:50 PM |          | 12:16 AM |          |
| 7:45 AM  |          |          |          |          |          |          |
|          |          | 12:00 AM |          |          | 1:30 AM  | 2:30 AM  |
| 9:30 AM  |          | 11:30 AM | 1:30 PM  |          |          | 2:40 PM  |
|          | 2:55 PM  |          | 4:05 PM  | 5:00 PM  | 6:15 PM  |          |
|          |          | 12:30 PM |          |          |          | 2:15 PM  |
|          | 11:30 PM |          | 12:50 AM |          |          |          |
|          |          | 11:45 PM |          |          |          |          |
|          | 6:15 AM  |          | 7:00 AM  |          | 8:05 AM  | 9:05 AM  |
|          |          | 11:50 PM | 12:20 AM |          | 12:50 AM |          |
| 2:30 AM  | 4:50 AM  | 6:05 AM  |          | 7:05 AM  |          |          |
| 10:30 AM |          |          | 11:30 AM |          | 12:30 PM | 1:30 PM  |
| 12:30 AM |          | 2:00 AM  | 3:00 AM  | 4:00 AM  | 5:00 AM  | 5:25 AM  |
|          |          | 7:10 AM  | 8:15 AM  | 9:10 AM  |          | 9:19 AM  |
| 7:20 AM  | 8:30 AM  | 10:30 AM | 11:40 AM | 12:40 PM |          | 2:00 PM  |
| 12:45 AM | 2:18 AM  | 3:15 AM  |          |          | 5:20 AM  | 6:30 AM  |
|          | 3:00 PM  | 4:00 PM  |          | 6:00 PM  |          |          |
|          |          | 1:00 PM  |          |          |          |          |
|          | 4:00 AM  |          |          | 4:30 AM  |          | 4:50 AM  |
| 7:50 PM  | 9:30 PM  |          | 10:30 PM | 11:30 PM |          |          |
| 8:40 AM  | 10:15 AM | 11:15 AM |          | 12:15 PM | 1:15 PM  | 2:45 PM  |
|          |          | 10:10 PM |          |          | 11:10 PM |          |
|          | 9:15 PM  |          |          | 10:15 PM | 11:15 PM | 12:15 AM |
| 11:35 PM |          | 12:35 AM |          | 1:45 AM  | 2:45 AM  | 5:30 AM  |
| 4:15 PM  | 5:15 PM  | 7:15 PM  |          |          | 8:15 PM  |          |

|          |          |          |          |          |          |          |
|----------|----------|----------|----------|----------|----------|----------|
|          |          |          |          | 5:15 AM  |          |          |
|          |          | 5:00 PM  |          | 6:15 PM  | 7:15 PM  | 7:45 PM  |
| 12:30 AM |          | 1:45 AM  |          |          | 2:50 AM  | 3:50 AM  |
| 7:50 AM  |          | 9:00 AM  | 10:00 AM | 11:00 AM | 12:00 PM | 1:00 PM  |
| 11:00 AM | 1:20 PM  | 2:20 PM  | 3:49 PM  |          | 4:35 PM  | 5:30 PM  |
| 11:05 AM | 11:30 AM | 12:30 PM | 1:30 PM  | 3:40 PM  | 4:40 PM  | 5:50 PM  |
|          |          | 9:40 AM  |          | 11:00 AM |          |          |
|          |          | 11:15 AM |          | 12:30 PM |          |          |
| 4:00 AM  |          | 5:30 AM  | 6:30 AM  | 8:00 AM  | 9:00 AM  | 10:00 AM |
|          |          |          | 1:30 AM  |          | 2:45 AM  | 3:45 AM  |
| 9:50 PM  | 10:50 PM |          | 11:50 PM |          | 12:50 AM | 1:50 AM  |
| 6:15 AM  | 7:45 AM  | 8:45 AM  | 9:45 AM  |          | 10:45 AM | 11:45 AM |
| 2:05 AM  |          | 3:15 AM  |          |          | 5:30 AM  | 6:10 AM  |
|          |          | 5:45 AM  | 6:45 AM  |          | 7:10 AM  | 7:22 AM  |
| 9:00 AM  |          | 10:15 AM | 11:15 AM | 12:15 PM |          | 1:15 PM  |
|          | 5:15 AM  | 5:40 AM  |          |          |          |          |
| 10:30 AM |          | 11:30 AM |          |          | 12:30 PM |          |
|          |          |          |          |          | 4:11 AM  |          |
| 4:00 PM  |          | 5:00 PM  | 5:40 PM  | 6:45 PM  | 8:00 PM  | 10:20 PM |
| 2:30 AM  | 4:20 AM  | 5:30 AM  |          |          | 9:45 AM  |          |
|          | 9:20 PM  |          | 10:50 PM | 11:50 PM | 12:50 AM | 1:50 AM  |
|          |          | 2:45 PM  |          |          | 3:30 PM  | 3:37 PM  |
| 5:45 PM  |          |          | 6:50 PM  |          |          | 7:50 PM  |
| 10:30 PM |          |          | 11:40 PM |          | 12:50 AM |          |
| 2:00 PM  | 3:30 PM  | 4:30 PM  | 5:30 PM  |          | 10:00 PM |          |
|          | 6:30 PM  |          | 7:15 PM  |          | 8:15 PM  | 9:15 PM  |
| 7:00 AM  | 11:00 AM | 12:00 PM |          |          | 1:15 PM  | 2:24 PM  |
| 11:15 AM |          |          | 12:30 PM | 1:35 PM  | 2:45 PM  | 4:30 PM  |
|          | 10:40 PM |          |          |          | 12:05 AM |          |
|          |          | 6:30 AM  |          |          | 8:00 AM  | 10:15 AM |
| 10:40 PM |          | 11:45 PM |          | 1:00 AM  | 2:00 AM  |          |
|          | 9:45 AM  | 11:15 AM | 12:15 PM |          |          | 1:15 PM  |
| 3:30 PM  |          |          |          | 5:15 PM  |          | 6:25 PM  |
| 2:30 AM  |          |          |          |          |          | 3:50 AM  |
| 11:15 AM |          | 12:50 PM | 2:00 PM  |          |          | 3:00 PM  |
|          | 10:00 PM |          | 11:15 PM | 11:40 PM | 12:00 AM | 2:45 AM  |
| 7:00 AM  | 9:15 AM  | 11:10 AM | 12:10 PM | 1:15 PM  | 2:15 PM  | 3:15 PM  |
|          | 5:30 AM  | 6:30 AM  | 8:00 AM  | 9:20 AM  | 12:20 PM |          |
|          |          |          | 6:10 AM  | 7:25 AM  |          | 8:30 AM  |
|          |          | 7:45 AM  | 9:20 AM  | 11:45 AM |          | 12:45 PM |
| 11:00 AM | 1:15 PM  |          | 8:00 PM  |          | 9:00 PM  | 10:00 PM |
|          | 8:15 PM  | 9:30 PM  |          | 10:30 PM | 2:25 AM  |          |
|          | 2:25 AM  |          |          |          | 3:45 AM  |          |

|          |          |          |          |          |          |          |
|----------|----------|----------|----------|----------|----------|----------|
| 9:15 AM  |          | 11:00 AM |          |          | 12:00 PM |          |
|          | 8:00 PM  |          |          |          |          | 9:30 PM  |
| 9:15 AM  |          | 11:00 AM |          |          |          |          |
|          |          |          |          |          | 5:15 PM  |          |
| 6:15 AM  |          | 8:00 AM  | 10:00 AM |          |          |          |
| 5:45 AM  |          |          |          |          | 8:00 AM  | 9:00 AM  |
|          |          | 4:45 AM  |          | 5:20 AM  | 5:55 AM  |          |
| 3:30 PM  |          |          |          |          | 5:00 PM  |          |
|          | 8:10 PM  | 9:20 PM  |          | 10:15 PM | 12:30 PM | 2:55 AM  |
| 3:15 AM  | 5:15 AM  | 7:15 AM  |          |          | 8:15 AM  | 9:15 AM  |
| 3:00 AM  | 4:30 AM  | 5:30 AM  | 6:30 AM  |          |          |          |
| 1:15 AM  |          | 2:30 AM  | 3:30 AM  | 4:30 AM  | 5:40 AM  | 9:15 AM  |
|          |          | 10:00 PM |          |          |          | 11:15 PM |
| 7:50 AM  |          |          |          | 8:55 AM  | 11:00 AM | 12:00 PM |
|          |          | 5:30 PM  |          | 7:15 PM  | 8:15 PM  | 9:15 PM  |
|          |          | 1:00 AM  |          |          |          |          |
| 11:55 AM |          |          | 1:15 PM  | 2:15 PM  | 3:15 PM  | 4:15 PM  |
|          |          | 2:30 AM  |          |          |          | 3:45 AM  |
|          | 10:40 PM |          | 11:40 PM |          |          |          |
|          | 9:30 PM  | 10:15 PM | 2:20 AM  |          |          |          |
|          | 5:20 PM  | 6:28 PM  | 9:00 PM  | 10:00 PM |          |          |
|          |          | 1:10 AM  |          |          |          |          |
|          |          | 9:00 AM  |          | 12:00 PM |          |          |
| 7:45 AM  |          | 9:15 AM  |          | 10:15 AM | 11:40 AM | 3:00 PM  |
|          |          | 9:40 AM  |          |          | 10:45 AM |          |
| 2:45 AM  |          |          | 4:00 AM  | 10:40 AM |          |          |
|          |          |          |          |          |          | 6:45 AM  |
|          |          |          |          |          |          | 3:40 PM  |
| 8:00 AM  |          |          | 10:10 AM | 11:30 AM |          | 2:00 PM  |
| 8:00 AM  | 9:20 AM  | 10:30 AM |          | 11:45 AM |          | 12:40 PM |
| 2:30 PM  | 4:15 PM  | 5:30 PM  | 8:00 PM  | 9:00 PM  |          | 10:00 PM |
|          | 5:30 AM  |          | 7:00 AM  | 8:00 AM  | 10:00 AM | 12:30 PM |
| 2:15 AM  | 3:25 AM  |          |          |          | 4:30 AM  |          |
| 1:45 AM  | 3:45 AM  | 4:45 AM  |          | 7:45 AM  |          |          |
|          | 1:00 PM  |          |          |          | 2:40 PM  | 3:50 PM  |
|          |          | 9:15 PM  |          |          | 10:25 PM | 11:25 PM |
| 10:50 AM | 12:00 PM | 1:00 PM  | 2:00 PM  | 3:20 PM  | 4:20 PM  | 6:10 PM  |
|          | 2:00 PM  |          | 4:30 PM  |          |          |          |
| 10:35 PM |          | 12:00 AM | 1:00 AM  | 2:00 AM  |          | 3:00 AM  |
|          |          |          | 3:15 AM  |          |          |          |
|          | 12:30 PM | 1:30 PM  | 2:30 PM  |          | 3:30 PM  | 4:30 PM  |
| 7:20 AM  | 10:30 AM | 11:30 AM | 2:30 PM  | 3:30 PM  |          |          |



|          |          |          |          |          |          |         |
|----------|----------|----------|----------|----------|----------|---------|
| 5:10 AM  | 6:40 AM  | 8:10 AM  | 10:30 AM | 11:30 AM | 12:30 PM | 2:30 PM |
| 5:00 AM  | 6:15 AM  |          |          |          |          |         |
| 10:50 PM | 12:45 AM | 2:00 AM  |          |          | 3:15 AM  |         |
| 9:30 PM  | 10:40 PM | 11:40 PM |          |          |          |         |
| 3:50 AM  |          | 5:00 AM  |          |          | 6:00 AM  | 7:00 AM |
| 6:15 PM  |          | 8:45 PM  |          |          |          | 9:45 PM |

| 10 cm    | Oxytocin | Type of breech |
|----------|----------|----------------|
| 11:30 PM | 1        | franck         |
| 2:00 AM  | 1        | franck         |
| 4:15 AM  | 0        | complete       |
| 12:30 PM | 1        | franck         |
| 6:45 PM  | 1        | franck         |
| 8:30 PM  | 1        | franck         |
| 9:30 AM  | 1        | complete       |
| 1:45 PM  | 1        | franck         |
| 11:00 AM | 1        | franck         |
| 8:00 AM  | 1        | franck         |
| 11:00 AM | 0        | complete       |
| 1:00 AM  | 1        | complete       |
| 5:30 AM  | 1        | franck         |
| 4:30 PM  | 1        | franck         |
| 5:30 AM  | 1        | franck         |
| 12:15 AM | 1        | complete       |
| 7:00 AM  | 1        | franck         |
| 2:15 AM  | 0        | franck         |
| 6:15 AM  | 1        | franck         |
| 6:15 PM  | 1        | franck         |
| 3:00 AM  | 1        | complete       |
| 10:40 AM | 1        | franck         |
| 4:15 AM  | 1        | franck         |
| 7:15 AM  | 1        | franck         |
| 5:00 AM  | 1        | franck         |
| 4:15 AM  | 1        | franck         |
| 1:30 AM  | 0        | franck         |
| 6:00 AM  | 1        | franck         |
| 10:30 PM | 1        | franck         |
| 12:30 PM | 1        | franck         |
| 8:45 AM  | 0        | complete       |
| 12:00 PM | 0        | complete       |
| 3:15 AM  | 1        | franck         |
| 11:00 PM | 1        | franck         |
| 2:10 PM  | 0        | complete       |
| 6:45 PM  | 1        | franck         |
| 10:30 AM | 1        | franck         |
| 2:15 PM  | 1        | franck         |
| 2:15 PM  | 1        | franck         |
| 12:15 AM | 1        | franck         |
| 1:15 AM  | 0        | complete       |
| 5:45 PM  | 0        | complete       |

|          |   |          |
|----------|---|----------|
| 9:15 PM  | 1 | franck   |
| 9:00 PM  | 0 | franck   |
| 9:15 PM  | 1 | franck   |
| 9:30 AM  | 1 | franck   |
| 11:20 PM | 0 | complete |
| 1:30 AM  | 1 | franck   |
| 11:30 AM | 1 | franck   |
| 8:30 AM  | 1 | franck   |
| 3:30 AM  | 0 | complete |
| 11:15 AM | 1 | franck   |
| 12:00 PM | 1 | franck   |
| 12:30 AM | 1 | complete |
| 9:00 PM  | 1 | franck   |
| 9:00 PM  | 1 | franck   |
| 3:45 AM  | 1 | franck   |
| 8:15 AM  | 1 | complete |
| 10:20 AM | 1 | franck   |
| 3:15 PM  | 1 | complete |
| 3:45 AM  | 1 | franck   |
| 3:00 AM  | 1 | franck   |
| 12:30 PM | 1 | franck   |
| 3:45 PM  | 0 | franck   |
| 4:45 PM  | 1 | complete |
| 4:15 AM  | 1 | complete |
| 6:30 AM  | 0 | complete |
| 5:00 PM  | 1 | complete |
| 12:45 AM | 1 | franck   |
| 9:20 PM  | 1 | franck   |
| 2:00 AM  | 1 | franck   |
| 9:30 AM  | 1 | complete |
| 1:05 PM  | 0 | franck   |
| 4:45 AM  | 1 | franck   |
| 4:45 AM  | 1 | franck   |
| 8:45 AM  | 1 | franck   |
| 10:00 PM | 1 | franck   |
| 2:15 PM  | 1 | franck   |
| 10:00 PM | 1 | complete |
| 13h45    | 1 | complete |
| 11:30 PM | 1 | complete |
| 8:30 PM  | 0 | franck   |
| 11:10 PM | 0 | franck   |
| 12:00 PM | 1 | franck   |
| 3:20 PM  | 1 | franck   |

|          |   |          |
|----------|---|----------|
| 1:15 AM  | 0 | complete |
| 3:45 AM  | 1 | complete |
| 11:30 PM | 1 | complete |
| 7:15 PM  | 1 | franck   |
| 4:00 AM  | 1 | franck   |
| 7:15 AM  | 1 | franck   |
| 9:18 PM  | 0 | complete |
| 9:45 AM  | 1 | complete |
| 9:00 PM  | 1 | complete |
| 4:30 AM  | 1 | franck   |
| 9:00 PM  | 1 | franck   |
| 9:15 PM  | 1 | complete |
| 11:00 AM | 1 | complete |
| 3:30 PM  | 1 | franck   |
| 5:30 AM  | 1 | franck   |
| 2:15 PM  | 1 | franck   |
| 1:40 AM  | 1 | complete |
| 9:00 AM  | 1 | franck   |
| 6:15 AM  | 1 | franck   |
| 5:15 PM  | 1 | complete |
| 12:45 AM | 0 | complete |
| 2:00 AM  | 1 | franck   |
| 11:45 AM | 1 | franck   |
| 5:15 PM  | 1 | franck   |
| 5:30 AM  | 1 | complete |
| 10:00 PM | 1 | complete |
| 2:30 AM  | 1 | complete |
| 11:00 AM | 1 | franck   |
| 5:45 AM  | 1 | franck   |
| 9:30 PM  | 1 | franck   |
| 12:45 AM | 1 | franck   |
| 5:45 AM  | 1 | franck   |
| 2:30 PM  | 0 | franck   |
| 7:15 PM  | 1 | franck   |
| 5:30 AM  | 1 | franck   |
| 5:00 PM  | 1 | franck   |
| 10:40 PM | 1 | franck   |
| 9:50 PM  | 1 | complete |
| 6:15 AM  | 0 | complete |
| 10:30 PM | 1 | franck   |
| 4:45 PM  | 1 | complete |
| 12:45 PM | 1 | franck   |
| 10:30 AM | 1 | complete |

|          |   |          |
|----------|---|----------|
| 11:15 AM | 1 | complete |
| 12:20 AM | 1 | franck   |
| 8:00 AM  | 0 | franck   |
| 12:30 AM | 1 | franck   |
| 3:00 PM  | 1 | complete |
| 11:10 AM | 1 | franck   |
| 9:15 PM  | 1 | franck   |
| 5:00 PM  | 1 | complete |
| 3:00 PM  | 1 | complete |
| 11:30 PM | 1 | franck   |
| 7:00 AM  | 0 | franck   |
| 12:45 PM | 1 | franck   |
| 5:00 PM  | 1 | franck   |
| 3:45 PM  | 1 | franck   |
| 5:45 AM  | 0 | franck   |
| 2:00 PM  | 1 | franck   |
| 5:30 AM  | 1 | franck   |
| 1:15 PM  | 1 | franck   |
| 11:45 PM | 1 | franck   |
| 11:00 AM | 1 | franck   |
| 6:30 AM  | 1 | franck   |
| 5:15 PM  | 0 | complete |
| 6:00 PM  | 1 | franck   |
| 9:00 AM  | 1 | franck   |
| 8:00 AM  | 1 | franck   |
| 11:20 AM | 1 | franck   |
| 11:00 AM | 1 | complete |
| 12:15 AM | 0 | franck   |
| 7:20 PM  | 1 | franck   |
| 6:30 AM  | 1 | complete |
| 6:45 PM  | 0 | complete |
| 9:00 AM  | 1 | franck   |
| 11:10 PM | 0 | complete |
| 11:45 AM | 1 | complete |
| 8:45 AM  | 1 | franck   |
| 5:15 AM  | 1 | franck   |
| 10:00 AM | 1 | franck   |
| 9:30 AM  | 1 | complete |
| 2:00 PM  | 0 | complete |
| 7:45 PM  | 0 | franck   |
| 2:45 PM  | 1 | franck   |
| 6:00 AM  | 0 | franck   |
| 5:00 AM  | 1 | franck   |

|          |   |          |
|----------|---|----------|
| 12:15 AM | 1 | franck   |
| 9:45 PM  | 0 | complete |
| 8:30 AM  | 1 | complete |
| 9:05 AM  | 0 | franck   |
| 3:30 PM  | 1 | franck   |
| 2:45 AM  | 1 | complete |
| 5:15 PM  | 0 | complete |
| 10:30 PM | 0 | franck   |
| 6:00 AM  | 0 | franck   |
| 2:00 PM  | 1 | franck   |
| 5:30 AM  | 0 | complete |
| 6:30 AM  | 1 | franck   |
| 4:45 AM  | 1 | franck   |
| 2:20 AM  | 1 | franck   |
| 8:15 PM  | 1 | complete |
| 12:45 PM | 1 | franck   |
| 3:45 AM  | 1 | franck   |
| 12:45 PM | 0 | complete |
| 7:30 AM  | 1 | franck   |
| 2:45 PM  | 1 | franck   |
| 3:30 AM  | 1 | complete |
| 9:15 PM  | 1 | franck   |
| 4:15 AM  | 0 | complete |
| 1:45 PM  | 1 | franck   |
| 12:45 PM | 1 | franck   |
| 12:40 AM | 1 | franck   |
| 10:30 PM | 0 | franck   |
| 6:05 PM  | 1 | franck   |
| 4:00 PM  | 1 | franck   |
| 11:45 PM | 1 | complete |
| 1:45 AM  | 1 | franck   |
| 10:50 AM | 0 | franck   |
| 7:45 PM  | 1 | franck   |
| 3:00 AM  | 1 | franck   |
| 1:15 AM  | 0 | franck   |
| 4:20 AM  | 1 | franck   |
| 9:45 PM  | 1 | franck   |
| 10:30 PM | 0 | franck   |
| 9:45 AM  | 1 | franck   |
| 8:45 AM  | 1 | franck   |
| 12:30 PM | 1 | complete |
| 2:45 PM  | 0 | franck   |
| 4:00 AM  | 1 | franck   |

|          |   |          |
|----------|---|----------|
| 5:30 AM  | 1 | franck   |
| 11:30 AM | 1 | franck   |
| 10:50 PM | 1 | complete |
| 2:30 PM  | 1 | franck   |
| 8:30 AM  | 1 | franck   |
| 5:00 AM  | 1 | franck   |
| 9:00 PM  | 1 | complete |
| 8:58 AM  | 1 | franck   |
| 9:45 PM  | 1 | franck   |
| 1:30 AM  | 0 | franck   |
| 12:58 AM | 1 | complete |
| 4:00 PM  | 0 | franck   |
| 11:45 PM | 1 | complete |
| 1:10 AM  | 0 | franck   |
| 6:45 AM  | 1 | franck   |
| 9:00 AM  | 1 | franck   |
| 9:30 AM  | 1 | franck   |
| 7:15 AM  | 1 | complete |
| 12:40 AM | 1 | franck   |
| 9:45 AM  | 0 | franck   |
| 3:30 AM  | 1 | complete |
| 3:45 PM  | 1 | franck   |
| 8:00 PM  | 1 | complete |
| 3:30 PM  | 1 | franck   |
| 2:00 AM  | 0 | complete |
| 12:45 AM | 0 | franck   |
| 9:50 AM  | 1 | complete |
| 1:35 AM  | 1 | complete |
| 8:00 AM  | 1 | complete |
| 3:30 PM  | 1 | complete |
| 5:35 AM  | 1 | complete |
| 9:28 AM  | 1 | franck   |
| 3:00 PM  | 1 | complete |
| 7:35 AM  | 1 | complete |
| 9:25 PM  | 1 | franck   |
| 1:45 PM  | 0 | franck   |
| 5:10 AM  | 1 | franck   |
| 12:30 AM | 1 | franck   |
| 3:45 PM  | 1 | franck   |
| 1:00 AM  | 1 | complete |
| 1:15 AM  | 1 | franck   |
| 8:50 AM  | 1 | complete |
| 9:15 PM  | 1 | franck   |

|          |   |          |
|----------|---|----------|
| 6:20 AM  | 1 | franck   |
| 8:45 PM  | 1 | franck   |
| 4:50 AM  | 1 | franck   |
| 2:00 PM  | 1 | complete |
| 6:45 PM  | 1 | franck   |
| 6:50 PM  | 1 | franck   |
| 12:00 PM | 1 | franck   |
| 1:30 PM  | 1 | franck   |
| 11:00 AM | 1 | franck   |
| 7:55 AM  | 1 | franck   |
| 2:55 AM  | 1 | franck   |
| 12:45 PM | 1 | franck   |
| 6:29 AM  | 1 | complete |
| 7:37 AM  | 1 | complete |
| 2:40 PM  | 1 | franck   |
| 6:10 AM  | 1 | complete |
| 1:30 PM  | 1 | franck   |
| 4:19 AM  | 0 | franck   |
| 11:00 PM | 1 | complete |
| 10:15 AM | 1 | franck   |
| 3:00 AM  | 1 | franck   |
| 4:03 PM  | 1 | complete |
| 8:50 PM  | 1 | franck   |
| 1:50 AM  | 0 | complete |
| 12:00 AM | 1 | franck   |
| 10:45 PM | 0 | franck   |
| 3:16 PM  | 1 | franck   |
| 6:15 PM  | 1 | franck   |
| 12:56 AM | 1 | franck   |
| 11:10 AM | 1 | complete |
| 4:45 AM  | 1 | franck   |
| 3:00 PM  | 0 | franck   |
| 6:30 PM  | 0 | franck   |
| 5:00 AM  | 0 | complete |
| 4:20 PM  | 0 | franck   |
| 2:53 AM  | 0 | complete |
| 3:50 PM  | 1 | complete |
| 1:10 PM  | 1 | franck   |
| 9:30 AM  | 1 | complete |
| 1:45 PM  | 1 | franck   |
| 12:00 AM | 1 | franck   |
| 2:35 AM  | 1 | franck   |
| 4:00 AM  | 0 | complete |



|          |   |          |
|----------|---|----------|
| 1:30 PM  | 0 | franck   |
| 10:30 PM | 0 | complete |
| 1:20 PM  | 1 | franck   |
| 5:38 PM  | 0 | franck   |
| 10:50 AM | 1 | complete |
| 10:00 AM | 1 | complete |
| 7:00 AM  | 0 | complete |
| 6:15 PM  | 1 | franck   |
| 4:55 AM  | 1 | complete |
| 10:15 AM | 1 | complete |
| 7:45 AM  | 1 | franck   |
| 10:15 AM | 1 | franck   |
| 12:00 AM | 0 | franck   |
| 2:05 PM  | 1 | franck   |
| 10:15 PM | 0 | complete |
| 2:30 AM  | 0 | complete |
| 5:15 PM  | 0 | franck   |
| 5:00 AM  | 0 | complete |
| 1:25 AM  | 1 | franck   |
| 3:10 AM  | 1 | complete |
| 11:00 PM | 1 | franck   |
| 3:00 AM  | 0 | franck   |
| 1:30 PM  | 1 | complete |
| 4:10 PM  | 1 | franck   |
| 11:30 AM | 0 | franck   |
| 12:00 PM | 1 | complete |
| 5:10 AM  | 0 | complete |
| 6:55 AM  | 0 | franck   |
| 3:50 PM  | 0 | complete |
| 3:00 PM  | 1 | complete |
| 1:00 PM  | 1 | franck   |
| 12:15 AM | 1 | complete |
| 1:30 PM  | 1 | franck   |
| 5:20 AM  | 0 | franck   |
| 6:45 AM  | 1 | franck   |
| 5:20 PM  | 1 | franck   |
| 12:25 AM | 0 | franck   |
| 8:00 PM  | 1 | franck   |
| 5:30 PM  | 1 | complete |
| 3:50 AM  | 1 | franck   |
| 4:40 AM  | 1 | franck   |
| 4:53 PM  | 0 | franck   |
| 5:10 PM  | 1 | complete |

|          |   |          |
|----------|---|----------|
| 5:30 PM  | 1 | franck   |
| 6:20 AM  | 0 | franck   |
| 4:30 AM  | 1 | complete |
| 12:40 AM | 0 | complete |
| 8:00 AM  | 1 | franck   |
| 10:45 PM | 1 | franck   |

| Number     | 3 cm  | 4 cm  | 5 cm  | 6 cm  | 7 cm  | 8 cm  |
|------------|-------|-------|-------|-------|-------|-------|
| 51059728   | 19:15 |       | 21:00 |       |       | 22:00 |
| 5526774959 |       |       |       |       | 0:15  | 1:15  |
| 5602530242 |       | 3:15  |       |       | 3:45  |       |
| 5502172123 | 8:00  |       |       |       | 9:00  | 10:30 |
| 5600384320 |       | 17:00 |       |       | 18:00 |       |
| 5513172125 |       | 17:00 |       | 19:00 |       |       |
| 51241267   | 4:00  | 4:45  |       | 6:00  | 7:00  | 8:45  |
| 5539375461 |       |       |       |       | 13:00 |       |
| 5525222757 | 6:45  |       | 8:15  |       | 9:15  | 9:45  |
| 5615971210 | 4:00  |       | 5:00  | 6:00  |       |       |
| 5603588855 |       |       | 10:00 |       |       |       |
| 5501703388 | 22:15 | 22:30 | 23:30 |       | 0:15  |       |
| 5613684939 |       | 2:00  |       | 3:00  |       | 4:00  |
| 5514541037 |       |       |       | 12:10 | 13:15 | 14:30 |
| 5539110834 |       |       |       |       |       | 4:00  |
| 5619252638 |       | 22:30 |       |       |       |       |
| 5613670286 | 3:20  | 4:45  | 5:05  |       |       | 6:10  |
| 5512014286 | 0:15  |       |       |       |       |       |
| 5619196862 | 23:20 |       | 0:45  | 1:45  | 4:45  | 5:15  |
| 5605749935 |       |       | 16:00 |       | 17:00 |       |
| 5531017495 |       |       |       |       |       |       |
| 51156036   | 6:20  |       |       |       | 7:20  |       |
| 5509872307 |       | 3:00  |       |       | 3:45  |       |
| 5619855755 |       |       |       |       | 6:00  | 6:30  |
| 5519391138 |       |       | 2:30  |       |       | 3:30  |
| 5508946258 | 0:30  | 1:15  |       | 2:15  |       | 3:15  |
| 5515573277 | 23:30 |       | 0:30  |       |       |       |
| 5502348541 |       | 3:00  |       |       | 4:00  |       |
| 51193719   | 20:30 |       |       |       |       | 21:30 |
| 51161655   |       | 10:15 | 11:15 |       |       |       |
| 5522842419 |       |       |       |       | 6:15  |       |
| 5605069117 | 9:45  |       |       |       |       | 11:00 |
| 5620292154 | 0:30  |       |       |       |       |       |
| 5609192223 | 19:00 |       | 20:00 | 21:00 |       | 22:00 |
| 51192154   | 11:30 |       |       | 12:30 |       |       |
| 51144036   |       |       |       | 16:15 |       | 17:15 |
| 5525888219 |       |       | 6:30  |       | 7:30  |       |
| 5620660855 | 9:00  | 10:15 | 11:15 | 12:15 |       | 13:15 |
| 51028829   | 11:00 |       | 12:00 |       |       | 13:00 |
| 51033467   | 20:45 | 21:45 | 22:45 |       |       | 23:00 |
| 5524747962 |       |       |       |       |       | 0:45  |
| 5515521343 |       |       |       |       |       | 17:15 |

|            |       |       |       |       |       |       |
|------------|-------|-------|-------|-------|-------|-------|
| 5608371965 |       | 20:00 |       | 20:30 |       | 21:00 |
| 5532291128 |       | 19:45 |       |       |       | 20:15 |
| 5600591858 |       | 18:15 |       | 19:15 |       |       |
| 5614632812 |       |       | 8:00  |       |       |       |
| 5527571975 |       | 22:45 |       |       |       |       |
| 5622182745 | 23:00 | 0:30  | 1:00  |       | 1:15  |       |
| 5623896918 |       |       |       |       | 8:30  | 9:30  |
| 5605687388 | 3:45  | 4:45  | 6:30  |       | 7:30  |       |
| 5624685143 | 2:30  |       |       |       |       |       |
| 5623483656 | 6:15  | 8:15  |       | 10:00 |       |       |
| 5611869928 | 9:30  |       | 11:00 |       |       |       |
| 5624483665 | 22:00 |       |       |       |       | 23:00 |
| 51144011   | 15:00 | 16:45 |       | 17:45 |       | 18:45 |
| 5526069283 |       | 19:00 |       | 20:00 |       |       |
| 5624728387 | 1:30  |       | 2:45  |       |       |       |
| 5529264526 | 6:30  |       | 8:00  |       |       |       |
| 5527923296 | 9:00  |       | 9:45  |       |       |       |
| 5616317477 |       |       | 13:45 |       |       | 14:45 |
| 5517734357 | 0:00  | 1:00  |       |       |       | 3:00  |
| 5626267152 |       |       |       | 1:30  |       |       |
| 5626749021 | 8:30  | 9:30  | 10:30 |       |       | 11:30 |
| 5503932166 | 12:30 |       |       | 13:30 | 14:30 |       |
| 5615187530 | 12:00 |       | 13:00 | 14:00 | 15:00 | 16:00 |
| 5613684939 |       | 1:15  |       |       | 2:15  | 3:15  |
| 5600642681 |       |       | 4:30  | 5:30  |       |       |
| 5612452130 |       |       |       |       |       |       |
| 5505554894 | 23:15 |       |       | 0:30  |       |       |
| 5628217559 |       | 20:30 |       |       | 21:15 |       |
| 5508075379 |       | 23:15 |       |       | 0:15  |       |
| 51136202   | 4:15  |       | 5:45  | 6:45  |       | 7:50  |
| 5609659641 | 10:30 |       | 11:45 |       |       |       |
| 5628197553 |       |       |       |       |       | 4:30  |
| 5519714470 | 1:15  |       |       | 2:05  |       | 3:15  |
| 5541790155 | 3:30  | 4:30  | 5:30  |       | 6:30  |       |
| 51127331   | 13:30 | 14:15 | 15:45 | 17:00 | 18:00 | 20:00 |
| 51031031   |       |       |       |       |       |       |
| 51140607   |       | 20:15 | 21:00 |       |       |       |
| 5627468336 | 9:15  | 10:15 | 11:30 |       |       |       |
| 5520154509 |       |       | 21:30 |       | 22:30 |       |
| 5627459747 |       |       |       |       |       | 20:15 |
| 5624767288 | 22:05 | 22:25 |       |       |       |       |
| 5541850476 |       | 6:45  |       | 7:50  |       | 8:45  |
| 51083731   | 13:00 | 14:00 |       |       | 15:00 |       |

|            |       |       |       |       |       |       |
|------------|-------|-------|-------|-------|-------|-------|
| 5532954162 |       |       |       | 0:45  |       |       |
| 51071598   | 1:45  | 2:45  |       |       |       |       |
| 5619416730 |       | 21:30 |       |       | 22:30 |       |
| 5619385711 |       | 14:30 | 15:45 | 17:00 | 18:45 |       |
| 5522661250 | 1:00  | 2:00  | 3:00  |       |       |       |
| 5507292208 | 4:00  |       |       |       | 5:00  | 6:00  |
| 5522881825 |       | 21:00 |       |       |       | 21:10 |
| 51054689   | 4:00  | 5:15  | 6:15  | 6:45  | 7:45  | 8:45  |
| 5538150837 |       | 15:30 | 16:30 | 17:45 |       | 18:45 |
| 5512349039 |       |       | 2:00  |       |       |       |
| 5508716791 |       |       | 18:00 | 19:00 | 20:00 |       |
| 5506456691 |       | 16:40 | 18:00 |       | 19:15 |       |
| 5543191706 |       | 9:00  |       |       |       | 10:00 |
| 5507823583 | 12:00 |       |       |       | 13:30 |       |
| 5622150009 | 2:30  | 3:30  |       | 4:30  |       |       |
| 5519964145 |       |       | 12:45 |       |       | 13:30 |
| 5542296777 | 22:15 | 23:30 | 0:30  | 0:40  | 1:10  |       |
| 5542542816 | 7:00  |       |       |       |       |       |
| 5517724960 |       |       |       | 5:00  |       | 6:00  |
| 5529963532 |       | 12:30 | 13:30 | 14:00 | 15:00 | 16:45 |
| 5538395559 | 23:00 |       | 0:00  |       |       |       |
| 5535436150 |       | 21:00 | 22:00 | 23:00 | 0:00  |       |
| 51219078   |       | 4:05  | 6:00  | 7:45  | 8:45  | 9:45  |
| 5543867874 | 16:00 |       |       |       |       | 16:45 |
| 5607292942 |       |       | 4:00  |       |       |       |
| 5602817101 |       |       |       | 19:15 | 20:15 |       |
| 51216958   |       |       | 1:30  |       |       |       |
| 5612064635 |       | 8:00  |       | 9:00  |       |       |
| 51196473   | 2:45  |       | 4:00  |       |       |       |
| 5619871216 | 18:00 | 19:00 | 20:15 |       | 21:15 |       |
| 5512041467 |       | 23:15 |       |       |       |       |
| 5501449370 |       | 4:00  | 4:40  |       |       | 5:15  |
| 5545693393 |       | 13h50 |       |       |       |       |
| 51059728   |       |       |       |       |       | 19:00 |
| 5540091645 | 3:00  |       | 4:00  |       |       | 5:00  |
| 5546720482 |       | 13:30 | 14:30 |       | 15:30 |       |
| 5513460394 |       | 20:15 |       |       | 21:40 |       |
| 5619137450 | 18:00 | 19:00 | 20:00 | 21:00 |       |       |
| 5546596507 | 5:30  |       |       |       |       |       |
| 5544693788 | 16:30 |       |       | 17:30 | 18:30 | 20:00 |
| 5546650562 |       |       | 15:15 | 16:15 |       | 16:35 |
| 7770       |       | 10:00 |       | 11:00 | 11:30 |       |
| 5545093512 |       |       | 8:00  | 9:30  |       |       |

|            |       |       |       |       |       |       |
|------------|-------|-------|-------|-------|-------|-------|
| 51181836   |       |       | 7:00  | 8:00  |       | 9:00  |
| 5542021036 | 22:15 |       |       |       |       | 23:45 |
| 5516963310 |       |       | 6:00  |       | 7:00  |       |
| 13256888   | 21:00 |       |       | 22:15 |       |       |
| 51141353   | 11:00 |       | 12:30 |       |       | 13:30 |
| 51104634   | 8:00  | 9:30  |       | 10:40 |       |       |
| 5545636813 | 17:00 | 18:00 | 19:00 |       |       |       |
| 5527243387 | 11:00 |       | 12:00 | 13:15 | 14:00 | 15:00 |
| 5503623281 | 12:00 |       |       | 13:15 |       |       |
| 5541759439 | 18:00 |       | 19:45 |       | 21:00 |       |
| 5522604363 |       | 3:15  |       | 4:45  |       |       |
| 5523448061 |       |       |       | 11:30 |       |       |
| 5544799175 |       |       | 14:00 | 15:00 |       |       |
| 5549179333 |       | 13:30 |       | 14:45 |       |       |
| 5532291128 | 3:30  |       |       |       | 5:00  |       |
| 5547276820 | 11:00 | 11:40 |       | 12:45 |       | 13:15 |
| 51165283   |       |       | 3:30  |       | 4:30  |       |
| 5608655588 |       |       | 11:00 |       |       |       |
| 5624990186 |       |       |       | 20:00 |       | 21:30 |
| 5517092137 | 5:30  | 7:00  | 8:00  | 9:00  |       |       |
| 5549052324 |       | 4:30  |       |       |       |       |
| 5528869553 |       |       |       |       |       | 16:15 |
| 5529950091 | 13:00 |       | 14:00 |       |       | 15:00 |
| 5543483009 |       |       | 4:00  | 5:00  |       | 6:00  |
| 5549963013 | 3:00  | 5:00  |       | 6:00  | 7:00  |       |
| 5513793834 | 6:30  | 8:00  | 9:15  | 10:15 |       |       |
| 5535707245 |       |       |       |       |       |       |
| 5602759204 | 22:45 |       |       |       |       |       |
| 5508137522 |       |       | 13:15 | 14:15 |       | 15:20 |
| 5529796107 |       | 3:30  |       | 4:30  |       | 5:30  |
| 5524291759 |       |       | 17:15 |       |       | 17:45 |
| 5617877359 |       | 4:00  |       | 5:45  | 6:45  |       |
| 5535198704 | 21:30 |       |       |       | 23:00 |       |
| 5508967072 |       |       | 10:30 |       |       | 11:30 |
| 5529673744 |       |       |       |       |       | 7:15  |
| 5533197975 |       |       | 4:45  |       |       |       |
| 5507776093 | 4:00  | 5:20  | 6:30  | 7:30  | 8:30  | 9:30  |
| 5521734595 | 3:00  | 4:00  | 6:30  | 7:00  | 8:00  |       |
| 51137841   | 8:30  |       | 10:00 | 11:00 | 12:00 | 13:00 |
| 5616167533 | 15:00 | 16:30 | 17:30 |       | 18:30 |       |
| 5549787504 | 9:30  |       | 11:00 |       |       | 12:15 |
| 5625403549 | 4:00  | 5:00  |       |       |       |       |
| 5607563229 |       | 2:00  |       | 3:00  | 4:00  |       |

|            |       |       |       |       |       |       |
|------------|-------|-------|-------|-------|-------|-------|
| 5543069444 | 20:30 | 21:15 |       | 22:30 | 23:15 |       |
| 51219136   | 20:15 |       |       |       |       |       |
| 5537391712 | 3:45  | 5:15  | 7:15  |       |       | 7:45  |
| 5538458207 |       | 6:30  |       |       | 7:30  | 8:30  |
| 5550116900 | 10:00 | 10:45 | 11:50 |       | 14:00 |       |
| 51232707   | 21:30 |       | 22:45 | 23:45 | 0:30  | 1:30  |
| 5529753364 | 15:30 |       | 16:15 | 16:30 |       | 16:45 |
| 5545553755 |       |       |       | 22:15 |       |       |
| 5548842863 | 2:45  |       | 3:45  |       | 5:00  |       |
| 5624425768 |       |       | 9:30  |       | 11:00 | 12:00 |
| 5546111810 |       |       |       |       | 5:00  |       |
| 5501318624 |       |       |       |       |       | 4:00  |
| 5616223208 | 2:30  |       |       |       |       | 3:30  |
| 5609356113 | 22:45 | 23:30 | 0:45  | 1:50  |       |       |
| 5550726077 | 14:20 |       | 16:00 | 17:00 | 18:10 | 19:15 |
| 51257164   | 20:00 | 21:05 |       |       | 23:05 |       |
| 5551175008 | 2:15  |       |       |       |       |       |
| 5627973746 |       |       |       |       |       | 12:40 |
| 5553235852 | 5:30  |       |       |       |       |       |
| 5507823583 |       | 9:15  | 10:45 |       | 11:45 | 12:45 |
| 5538705050 | 1:15  |       |       | 2:15  |       |       |
| 5546585995 |       | 17:00 |       | 18:00 | 19:00 |       |
| 51189799   |       | 2:30  | 3:15  |       |       |       |
| 51096053   |       |       | 12:15 | 13:15 |       |       |
| 5530148741 | 7:00  | 8:15  | 9:15  | 10:15 | 11:15 | 12:20 |
| 51293960   | 20:45 |       |       |       |       | 23:15 |
| 5523728553 | 21:15 |       |       |       |       |       |
| 5625337669 |       |       | 14:30 |       | 16:00 |       |
| 5538395559 |       |       | 11:00 | 12:00 | 13:00 | 14:00 |
| 5602659473 | 20:15 |       | 21:30 | 22:30 |       |       |
| 51194087   | 21:00 | 22:10 | 23:15 | 0:15  |       | 1:15  |
| 5626254523 | 10:30 |       |       | 10:45 |       |       |
| 51075017   | 13:45 | 15:15 | 16:30 |       |       | 17:35 |
| 5551168944 | 23:15 | 0:15  |       | 1:30  |       |       |
| 5542991137 |       |       |       |       |       |       |
| 5602738992 |       |       | 2:15  |       | 3:15  | 4:15  |
| 5552033557 |       | 15:30 | 16:45 |       | 17:45 | 18:45 |
| 51195927   | 21:00 |       |       |       |       |       |
| 5623051503 | 6:30  | 7:30  | 8:00  |       |       | 8:50  |
| 5540689207 | 0:15  |       | 2:15  | 3:15  | 5:15  | 7:45  |
| 5554425720 |       |       |       |       | 8:30  | 9:30  |
| 5554775021 |       |       |       | 13:45 |       |       |
| 51031031   |       | 2:30  |       |       | 3:15  |       |

|            |       |       |       |       |       |       |
|------------|-------|-------|-------|-------|-------|-------|
| 5624035445 |       | 21:45 |       | 23:45 | 1:15  | 2:15  |
| 5547574789 |       | 6:30  | 8:00  |       | 9:00  | 10:15 |
| 51143808   | 14:45 | 16:00 | 18:10 | 20:10 | 21:45 |       |
| 5515877920 |       | 12:45 |       |       |       |       |
| 51182428   | 4:00  |       | 5:30  |       | 6:45  |       |
| 5554053278 | 2:45  |       | 4:00  |       |       |       |
| 51254408   |       | 14:30 | 16:45 | 18:00 | 19:00 |       |
| 51128988   | 5:30  |       |       | 6:30  |       | 7:30  |
| 5552302834 | 18:45 |       |       | 19:45 |       |       |
| 51191709   | 21:00 |       | 22:15 |       | 23:15 |       |
| 51140124   | 20h30 |       | 21h45 |       | 22h45 |       |
| 5541865937 | 09h45 | 10h50 | 12h00 | 13H00 | 14h00 |       |
| 51201995   | 21h45 |       |       |       |       |       |
| 51185057   | 00h00 |       |       |       |       |       |
| 5502659345 | 04H45 |       |       |       | 05h45 |       |
| 51166114   | 02H15 |       |       | 03H30 | 04H30 |       |
| 5536631472 |       |       | 05H35 |       | 06H15 | 07H15 |
| 5517838431 | 06H15 |       |       |       |       |       |
| 5524523852 |       |       |       | 23H50 |       | 00H16 |
| 51052738   | 07H45 |       |       |       |       |       |
| 5549722836 |       |       | 00H00 |       |       | 01H30 |
| 5512741685 | 09H30 |       | 11H30 | 13H30 |       |       |
| 5506836106 |       | 14H55 |       | 16H05 | 17H00 | 18H15 |
| 5556858501 |       |       | 12H30 |       |       |       |
| 5529796107 |       | 23H30 |       | 00H50 |       |       |
| 5544286489 |       |       | 23H45 |       |       |       |
| 51096600   |       | 06H15 |       | 07H00 |       | 08H05 |
| 5602373527 |       |       | 23H50 | 00H20 |       | 00H50 |
| 51283399   | 02H30 | 04H50 | 06H05 |       | 07H05 |       |
| 5610891440 | 10H30 |       |       | 11H30 |       | 12H30 |
| 5539538240 | 00H30 |       | 02H00 | 03H00 | 04H00 | 05H00 |
| 5610132416 |       |       | 07H10 | 08H15 | 09H10 |       |
| 5555325392 | 07H20 | 08H30 | 10H30 | 11H40 | 12H40 |       |
| 5519948482 | 00H45 | 02H18 | 03H15 |       |       | 05H20 |
| 5557428777 |       | 15H00 | 16H00 |       | 18H00 |       |
| 5556136657 |       |       | 13:00 |       |       |       |
| 5544780583 |       | 04H00 |       |       | 04H30 |       |
| 51176011   | 19H50 | 21H30 |       | 22H30 | 23H30 |       |
| 5625060009 | 08H40 | 10H15 | 11H15 |       | 12H15 | 13H15 |
| 5531944655 |       |       | 22H10 |       |       | 23H10 |
| 12452888   |       | 21H15 |       |       | 22H15 | 23H15 |
| 5558830328 | 23H35 |       | 00H35 |       | 01H45 | 02H45 |
| 5516672310 | 16H15 | 17H15 | 19H15 |       |       | 20H15 |



|            |       |       |       |                  |                     |       |
|------------|-------|-------|-------|------------------|---------------------|-------|
| 5521098742 |       |       |       |                  | 05H15               |       |
| 5533004581 |       |       | 17H00 |                  | 18H15               | 19H15 |
| 51208294   | 00H30 |       | 01H45 |                  |                     | 02H50 |
| 5550630996 | 07H50 |       | 09H00 | 10H00            | 11H00               | 12H00 |
| 5623288141 | 11H00 | 13H20 | 14H20 | 15H49            |                     | 16H35 |
| 5558149510 | 11H05 | 11H30 | 12H30 | 13H30            | 15H40               | 16H40 |
| 5559844885 |       |       | 09H40 |                  | 11H00               |       |
| 5550434572 |       |       | 11H15 |                  | 12H30               |       |
| 5556265383 | 04H00 |       | 05H30 | 06H30            | 08H00               | 09H00 |
| 51223109   |       |       |       | 01H30            |                     | 02H45 |
| 5532453604 | 21H50 | 22H50 |       | 23H50            |                     | 00H50 |
| 5560222781 | 06H15 | 07H45 | 08H45 | 09H45            |                     | 10H45 |
| 51064787   | 02H05 |       | 03H15 |                  |                     | 05H30 |
| 5560556928 |       |       | 05H45 | 06H45            |                     | 07H10 |
| 5558571761 | 09H00 |       | 10H15 | 11H15            | 12H15               |       |
| 5548803659 |       | 05H15 | 05H40 |                  |                     |       |
| 5559035038 | 10H30 |       | 11H30 |                  |                     | 12H30 |
| 5627973746 |       |       |       |                  |                     | 04H11 |
| 5550088204 | 16H00 |       | 17H00 | 17H40            | 18H45               | 20H00 |
| 51068989   | 02H30 | 04H20 | 05H30 |                  |                     | 09H45 |
| 5560079103 |       | 21H20 |       | 22H50            | 23H50               | 00H50 |
| 5616595242 |       |       | 14H45 |                  |                     | 15H30 |
| 5561942614 | 17H45 |       |       | 18H50            |                     |       |
| 5547572567 | 22H30 |       |       | 23H40            |                     | 00H50 |
| 51237783   | 14H00 | 15H30 | 16H30 | 17H30            |                     | 22H00 |
| 5542044678 |       | 18H30 |       | 19H15            |                     | 20H15 |
| 5560880462 | 07H00 | 11H00 | 12H00 |                  |                     | 13H15 |
| 5554900919 | 11H15 |       |       | 12H30            | 13H35               | 14H45 |
| 51123251   |       | 22H40 |       |                  |                     | 00H05 |
| 5560329279 |       |       | 06H30 |                  |                     | 08H00 |
| 5548125770 | 22H40 |       | 23H45 |                  | 01H00               | 02H00 |
| 5563428936 |       | 09H45 | 11H15 | 12H15            |                     |       |
| 5533224449 | 15H30 |       |       |                  | 17H15 LE 14/08/2017 |       |
| 5504355532 | 02H30 |       |       |                  |                     |       |
| 5613593090 | 11H15 |       | 12H50 | 00 le 22/09/2017 |                     |       |
| 5614812967 |       | 22H00 |       | 23H15            | 23H40               | 00H00 |
| 5545645604 | 07H00 | 09H15 | 11H10 | 12H10            | 15 LE 06/10/2       | 14H15 |
| 5559130422 |       | 05H30 | 06H30 | 08H00            | 09H20               | 12H20 |
| 51047336   |       |       |       | 06H10            | 07H25               |       |
| 5502199304 |       |       | 07H45 | 09H20            | 10H45               |       |
| 5563864729 | 11H00 | 13H15 |       | 20H00            |                     | 21H00 |
| 51219136   |       | 20H15 | 21H30 |                  | 22H30               | 02H25 |
| 5515803451 |       | 2:25  |       |                  |                     | 3:45  |

|            |       |       |       |       |       |       |
|------------|-------|-------|-------|-------|-------|-------|
| 5563217354 | 9:15  |       | 11:00 |       |       | 12:00 |
| 51149551   |       | 20:00 |       |       |       |       |
| 5548165075 | 9:15  |       | 11:00 |       |       |       |
| 5542942940 |       |       |       |       |       | 17:15 |
| 5612955924 | 6:15  |       | 8:00  | 10:00 |       |       |
| 5557894680 | 5:45  |       |       |       |       | 8:00  |
| 5518124276 |       |       | 4:45  |       | 5:20  | 5:55  |
| 51070794   | 15:30 |       |       |       |       | 17:00 |
| 5616355873 |       | 20:10 | 21:20 |       | 22:15 | 12:30 |
| 5553840484 | 3:15  | 5:15  | 7:15  |       |       | 8:15  |
| 5559461131 | 3:00  | 4:30  | 5:30  | 6:30  |       |       |
| 5565462296 | 1:15  |       | 2:30  | 3:30  | 4:30  | 5:40  |
| 5623942485 |       |       | 22:00 |       |       |       |
| 5613229544 | 7:50  |       |       |       | 8:55  | 11:00 |
| 5553682254 |       |       | 17:30 |       | 19:15 | 20:15 |
| 51236378   |       |       | 1:00  |       |       |       |
| 5514651070 | 11:55 |       |       | 13:15 | 14:15 | 15:15 |
| 51185206   |       |       | 2:30  |       |       |       |
| 5549727987 |       | 22:40 |       | 23:40 |       |       |
| 5564256668 |       | 21:30 | 22:15 | 2:20  |       |       |
| 5565872629 |       | 17:20 | 18:28 | 21:00 | 22:00 |       |
| 5562475104 |       |       | 1:10  |       |       |       |
| 5566290234 |       |       |       |       | 12:00 |       |
| 5551323942 |       |       | 9:00  |       | 10:15 | 11:40 |
| 5625337669 | 7:45  |       | 9:15  |       |       | 10:45 |
| 5547625717 |       |       | 9:40  |       | 10:40 |       |
| 5551259375 | 2:45  |       |       | 4:00  |       |       |
| 5623051503 |       |       |       |       |       |       |
| 5566738555 |       |       |       |       |       |       |
| 5562096396 | 8:00  |       |       | 10:10 | 11:30 |       |
| 5538768102 | 8:00  | 9:20  | 10:30 |       | 11:45 |       |
| 5555092491 | 14:30 | 16:15 | 17:30 | 20:00 | 21:00 |       |
| 51048621   |       | 5:30  |       | 7:00  | 8:00  | 10:00 |
| 5557998855 | 2:15  | 3:25  |       |       |       | 4:30  |
| 5541323343 | 1:45  | 3:45  | 4:45  |       | 7:45  |       |
| 5524931353 |       | 13:00 |       |       |       | 14:40 |
| 5617529977 |       |       | 21:15 |       |       | 22:25 |
| 5566179591 | 10:50 | 12:00 | 13:00 | 14:00 | 15:20 | 16:20 |
| 5623940162 |       | 14:00 |       | 16:30 |       |       |
| 5602738992 | 22:35 |       | 0:00  | 1:00  | 2:00  |       |
| 5608180894 |       |       |       | 3:15  |       |       |
| 5545014090 |       | 12:30 | 13:30 | 14:30 |       | 15:30 |
| 51103417   | 7:20  | 10:30 | 11:30 | 14:30 | 15:30 |       |

|            |       |       |       |       |       |       |
|------------|-------|-------|-------|-------|-------|-------|
| 5500415413 | 5:10  | 6:40  | 8:10  | 10:30 | 11:30 | 12:30 |
| 5610555273 | 5:00  | 6:15  |       |       |       |       |
| 5532735308 | 22:50 | 0:45  | 2:00  |       |       | 3:15  |
| 51179056   | 21:30 | 22:40 | 23:40 |       |       |       |
| 5502558507 | 3:50  |       | 5:00  |       |       | 6:00  |
| 22708911   | 18:15 |       | 20:45 |       |       |       |

| 9 cm  | 10 cm | Ocytocine     | entation du siège |
|-------|-------|---------------|-------------------|
|       | 23:30 | 1             | ège décomplété    |
|       | 2:00  | 1             | ège décomplété    |
|       | 4:15  | 0             | siège complet     |
|       | 12:30 | 1             | ège décomplété    |
|       | 18:45 | 1             | ège décomplété    |
| 20:00 | 20:30 | 1             | ège décomplété    |
| 9:00  | 9:30  | 1             | siège complet     |
|       | 13:45 | 1             | ège décomplété    |
| 10:15 | 11:00 | 1             | ège décomplété    |
| 7:00  | 8:00  | 1             | ège décomplété    |
|       | 11:00 | 0             | siège complet     |
| 0:45  | 1:00  | 1             | siège complet     |
| 4:45  | 5:30  | 1             | emi décomplété    |
| 15:30 | 16:30 | 1             | ège décomplété    |
|       | 5:30  | 1             | ège décomplété    |
| 23:45 | 0:15  | 1             | siège complet     |
|       | 7:00  | 1             | ège décomplété    |
| 1:15  | 2:15  | 0             | ège décomplété    |
|       | 6:15  | 1             | ège décomplété    |
|       | 18:15 | 1             | ège décomplété    |
| 1:00  | 3:00  | 1             | siège complet     |
| 10:15 | 10:40 | 1             | ège décomplété    |
|       | 4:15  | 1             | ège décomplété    |
|       | 7:15  | 1/1/1900 0:00 | ège décomplété    |
| 4:30  | 5:00  |               | siège décomplété  |
|       | 4:15  | 1             | ège décomplété    |
| 1:15  | 1:30  | 0             | décomplété        |
| 5:00  | 6:00  | 1             | décomplété        |
|       | 22:30 | 1             | décomplété        |
|       | 12:30 | 1             | décomplété        |
| 6:45  | 8:45  | 0             | complet           |
| 11:45 | 12:00 | 0             | complet           |
| 1:45  | 3:15  | 1             | emi-décomplété    |
|       | 23:00 | 1             | ège décomplété    |
| 13:30 | 14:10 | 0             | siège complet     |
|       | 18:45 | 1             | ège décomplété    |
|       | 10:30 | 1             | décomplété        |
|       | 14:15 | 1             | ège décomplété    |
|       | 14:15 | 1             | ège décomplété    |
|       | 0:15  | 1             | ège décomplété    |
|       | 1:15  | 0             | siège complet     |
|       | 17:45 | 0             | siège complet     |

|       |       |   |                 |
|-------|-------|---|-----------------|
|       | 21:15 | 1 | semi décomplété |
| 20:45 | 21:00 | 0 | décomplété      |
| 20:15 | 21:15 | 1 | décomplété      |
|       | 9:30  | 1 | décomplété      |
| 23:15 | 23:20 | 0 | complet         |
|       | 1:30  | 1 | décomplété      |
| 10:30 | 11:30 | 1 | décomplété      |
|       | 8:30  | 1 | décomplété      |
|       | 3:30  | 0 | complet         |
|       | 11:15 | 1 | décomplété      |
|       | 12:00 | 1 | décomplété      |
| 0:00  | 0:30  | 1 | complet         |
| 20:00 | 21:00 | 1 | décomplété      |
|       | 21:00 | 1 | décomplété      |
|       | 3:45  | 1 | décomplété      |
|       | 8:15  | 1 | complet         |
|       | 10:20 | 1 | décomplété      |
|       | 15:15 | 1 | complet         |
| 3:30  | 3:45  | 1 | décomplété      |
| 2:15  | 3:00  | 1 | décomplété      |
|       | 12:30 | 1 | décomplété      |
|       | 15:45 | 0 | décomplété      |
|       | 16:45 | 1 | complet         |
|       | 4:15  | 1 | complet         |
| 6:00  | 6:30  | 0 | complet         |
|       | 17:00 | 1 | complet         |
|       | 0:45  | 1 | décomplété      |
|       | 21:20 | 1 | décomplété      |
| 1:15  | 2:00  | 1 | décomplété      |
| 9:00  | 9:30  | 1 | complet         |
|       | 13:05 | 0 | décomplété      |
|       | 4:45  | 1 | décomplété      |
|       | 4:45  | 1 | décomplété      |
| 7:45  | 8:45  | 1 | décomplété      |
| 21:00 | 22:00 | 1 | décomplété      |
| 3:30  | 14:15 | 1 | décomplété      |
|       | 22:00 | 1 | complet         |
| 12:45 | 13h45 | 1 | complet         |
|       | 23:30 | 1 | complet         |
|       | 20:30 | 0 | décomplété      |
| 22:45 | 23:10 | 0 | décomplété      |
| 10:45 | 12:00 | 1 | décomplété      |
|       | 15:20 | 1 | décomplété      |

|       |       |   |                                                 |
|-------|-------|---|-------------------------------------------------|
| 0:50  | 1:15  | 0 | complet                                         |
|       | 3:45  | 1 | complet                                         |
|       | 23:30 | 1 | complet                                         |
|       | 19:15 | 1 | décomplété                                      |
|       | 4:00  | 1 | décomplété                                      |
| 7:00  | 7:15  | 1 | décomplété                                      |
|       | 21:18 | 0 | complet                                         |
|       | 9:45  | 1 | complet                                         |
| 19:45 | 21:00 | 1 | complet                                         |
| 3:30  | 4:30  | 1 | décomplété                                      |
|       | 21:00 | 1 | décomplété                                      |
| 20:15 | 21:15 | 1 | complet                                         |
|       | 11:00 | 1 | complet                                         |
|       | 15:30 | 1 | décomplété                                      |
|       | 5:30  | 1 | décomplété                                      |
|       | 14:15 | 1 | décomplété                                      |
|       | 1:40  | 1 | complet                                         |
| 8:00  | 9:00  | 1 | décomplété                                      |
|       | 6:15  | 1 | décomplété                                      |
|       | 17:15 | 1 | complet                                         |
|       | 0:45  | 0 | complet                                         |
| 1:00  | 2:00  | 1 | emi décomplété                                  |
| 10:45 | 11:45 | 1 | décomplété                                      |
|       | 17:15 | 1 | décomplété                                      |
|       | 5:30  | 1 | complet                                         |
| 21:15 | 22:00 | 1 | complet                                         |
|       | 2:30  | 1 | complet                                         |
| 10:00 | 11:00 | 1 | décomplété                                      |
|       | 5:45  | 1 | emi décomplété                                  |
|       | 21:30 | 1 | décomplété                                      |
|       | 0:45  | 1 | emi décomplété                                  |
|       | 5:45  | 1 | décomplété                                      |
|       | 14:30 | 0 | décomplété                                      |
|       | 19:15 | 1 | décomplété                                      |
|       | 5:30  | 1 | décomplété                                      |
|       | 17:00 | 1 | emi décomplété rétention tete derniere spatules |
|       | 22:40 | 1 | décomplété                                      |
|       | 21:50 | 1 | complet                                         |
|       | 6:15  | 0 | complet                                         |
| 21:00 | 22:30 | 1 | emi décomplété                                  |
|       | 16:45 | 1 | complet                                         |
| 12:30 | 12:45 | 1 | décomplété                                      |
|       | 10:30 | 1 | complet                                         |

|       |       |   |                 |                                |
|-------|-------|---|-----------------|--------------------------------|
| 10:00 | 11:15 | 1 | complet         |                                |
|       | 0:20  | 1 | décomplété      |                                |
|       | 8:00  | 0 | décomplété      |                                |
| 23:09 | 0:30  | 1 | décomplété      |                                |
|       | 15:00 | 1 | complet         |                                |
|       | 11:10 | 1 | décomplété      |                                |
|       | 21:15 | 1 | décomplété      |                                |
| 15:45 | 17:00 | 1 | complet         |                                |
| 14:30 | 15:00 | 1 | complet         |                                |
| 22:20 | 23:30 | 1 | décomplété      |                                |
| 6:00  | 7:00  | 0 | décomplété      |                                |
| 12:30 | 12:45 | 1 | semi décomplété |                                |
| 15:45 | 17:00 | 1 | décomplété      |                                |
|       | 15:45 | 1 | décomplété      |                                |
|       | 5:45  | 0 | décomplété      |                                |
| 13:30 | 14:00 | 1 | semi décomplété |                                |
|       | 5:30  | 1 | décomplété      |                                |
| 12:15 | 13:15 | 1 | décomplété      |                                |
| 22:45 | 23:45 | 1 | décomplété      |                                |
| 10:00 | 11:00 | 1 | décomplété      |                                |
| 5:45  | 6:30  | 1 | décomplété      |                                |
|       | 17:15 | 0 | complet         | procidence : grande extraction |
| 17:00 | 18:00 | 1 | décomplété      |                                |
| 7:00  | 9:00  | 1 | décomplété      |                                |
|       | 8:00  | 1 | décomplété      |                                |
| 11:10 | 11:20 | 1 | décomplété      |                                |
| 10:15 | 11:00 | 1 | complet         |                                |
|       | 0:15  | 0 | décomplété      |                                |
| 16:15 | 19:20 | 1 | décomplété      |                                |
|       | 6:30  | 1 | complet         |                                |
|       | 18:45 | 0 | complet         |                                |
| 8:00  | 9:00  | 1 | décomplété      |                                |
|       | 23:10 | 0 | complet         |                                |
|       | 11:45 | 1 | complet         | rétenion tête denière          |
|       | 8:45  | 1 | décomplété      |                                |
|       | 5:15  | 1 | décomplété      |                                |
|       | 10:00 | 1 | décomplété      |                                |
| 8:20  | 9:30  | 1 | complet         |                                |
|       | 14:00 | 0 | complet         |                                |
|       | 19:45 | 0 | décomplété      |                                |
| 13:15 | 14:45 | 1 | décomplété      |                                |
| 5:45  | 6:00  | 0 | décomplété      |                                |
|       | 5:00  | 1 | décomplété      |                                |

|       |       |   |               |
|-------|-------|---|---------------|
|       | 0:15  | 1 | décomplété    |
| 21:30 | 21:45 | 0 | complet       |
|       | 8:30  | 1 | complet       |
|       | 9:05  | 0 | décomplété    |
| 15:00 | 15:30 | 1 | décomplété    |
|       | 2:45  | 1 | complet       |
| 17:05 | 17:15 | 0 | complet       |
|       | 22:30 | 0 | décomplété    |
|       | 6:00  | 0 | décomplété    |
| 13:00 | 14:00 | 1 | décomplété    |
|       | 5:30  | 0 | complet       |
| 5:30  | 6:30  | 1 | décomplété    |
|       | 4:45  | 1 | décomplété    |
|       | 2:20  | 1 | décomplété    |
|       | 20:15 | 1 | complet       |
|       | 12:45 | 1 | décomplété    |
|       | 3:45  | 1 | décomplété    |
|       | 12:45 | 0 | complet       |
| 6:15  | 7:30  | 1 | décomplété    |
| 13:45 | 14:45 | 1 | décomplété    |
|       | 2:45  | 1 | complet       |
| 20:15 | 21:15 | 1 | décomplété    |
|       | 4:15  | 0 | complet       |
|       | 13:45 | 1 | mi décomplété |
| 12:40 | 12:45 | 1 | décomplété    |
|       | 0:40  | 1 | mi décomplété |
| 22:15 | 22:30 | 0 | décomplété    |
| 17:00 | 18:05 | 1 | décomplété    |
| 15:00 | 16:00 | 1 | décomplété    |
|       | 23:45 | 1 | complet       |
|       | 1:45  | 1 | mi décomplété |
|       | 10:50 | 0 | décomplété    |
| 18:35 | 19:45 | 1 | décomplété    |
|       | 3:00  | 1 | mi décomplété |
| 0:30  | 1:15  | 0 | mi décomplété |
|       | 4:20  | 1 | décomplété    |
| 19:45 | 21:45 | 1 | décomplété    |
|       | 22:30 | 0 | décomplété    |
|       | 9:45  | 1 | décomplété    |
|       | 8:45  | 1 | décomplété    |
| 11:30 | 12:30 | 1 | complet       |
|       | 14:45 | 0 | décomplété    |
|       | 4:00  | 1 | décomplété    |



|       |       |   |                  |
|-------|-------|---|------------------|
| 3:30  | 5:30  | 1 | décomplété       |
|       | 11:30 | 1 | décomplété       |
|       | 22:50 | 1 | complet          |
|       | 14:30 | 1 | décomplété       |
|       | 8:30  | 1 | décomplété       |
|       | 5:00  | 1 | décomplété       |
| 20:00 | 21:00 | 1 | complet          |
| 8:30  | 8:58  | 1 | décomplété       |
| 20:45 | 21:45 | 1 | décomplété       |
| 0:30  | 1:30  | 0 | décomplété       |
|       | 00h58 | 1 | siège complet    |
| 15h00 | 16h00 | 0 | siège décomplété |
| 22H45 | 23H45 | 1 | siège complet    |
|       | 01h10 | 0 | siège décomplété |
|       | 06h45 | 1 | siège décomplété |
| 07H00 | 09H00 | 1 | siège décomplété |
| 08H30 | 09H30 | 1 | siège décomplété |
|       | 07H15 | 1 | siège complet    |
|       | 00H40 | 1 | siège décomplété |
|       | 09H45 | 0 | siège décomplété |
| 02H30 | 03H30 | 1 | siège complet    |
| 14H40 | 15H45 | 1 | siège décomplété |
|       | 20H00 | 1 | siège complet    |
| 14H15 | 15H30 | 1 | siège décomplété |
|       | 02H00 | 0 | siège complet    |
|       | 00H45 | 0 | siège décomplété |
| 09H05 | 09H50 | 1 | siège complet    |
|       | 01H35 | 1 | siège complet    |
|       | 08H00 | 1 | siège complet    |
| 13H30 | 15H30 | 1 | siège complet    |
| 05H25 | 05H35 | 1 | siège complet    |
| 09H19 | 09H28 | 1 | siège décomplété |
| 14H00 | 15h00 | 1 | siège complet    |
| 06H30 | 07H35 | 1 | siège complet    |
|       | 21H25 | 1 | siège décomplété |
|       | 13H45 | 0 | siège décomplété |
| 04H50 | 05H10 | 1 | siège décomplété |
|       | 00H30 | 1 | siège décomplété |
| 14H45 | 15H45 | 1 | siège décomplété |
|       | 01H00 | 1 | siège complet    |
| 00H15 | 01h15 | 1 | siège décomplété |
| 05H30 | 08H50 | 1 | siège complet    |
|       | 21H15 | 1 | siège décomplété |

|       |       |   |                  |                  |
|-------|-------|---|------------------|------------------|
|       | 06H20 | 1 | siège décomplété |                  |
| 19H45 | 20H45 | 1 | siège décomplété |                  |
| 03H50 | 04H50 | 1 | siège décomplété |                  |
| 13H00 | 14H00 | 1 | siège complet    |                  |
| 17H30 | 18H45 | 1 | siège décomplété |                  |
| 17H50 | 18H50 | 1 | siège décomplété |                  |
|       | 12H00 | 1 | siège décomplété |                  |
|       | 13H30 | 1 | siège décomplété |                  |
| 10H00 | 11H00 | 1 | siège décomplété |                  |
| 03H45 | 07H55 | 1 | siège décomplété |                  |
| 01H50 | 02H55 | 1 | siège décomplété |                  |
| 11H45 | 12H45 | 1 | siège décomplété |                  |
| 06H10 | 06H29 | 1 | siège complet    |                  |
| 07H22 | 07H37 | 1 | siège complet    |                  |
| 13H15 | 14H40 | 1 | siège décomplété |                  |
|       | 06H10 | 1 | siège complet    |                  |
|       | 13H30 | 1 | siège décomplété |                  |
|       | 04H19 | 0 | siège décomplété |                  |
| 22H20 | 23H00 | 1 | siège complet    |                  |
|       | 10H15 | 1 | siège décomplété |                  |
| 01H50 | 03H00 | 1 | siège décomplété |                  |
| 15H37 | 16H03 | 1 | siège complet    |                  |
| 19H50 | 20H50 | 1 | siège décomplété |                  |
|       | 01H50 | 0 | siège complet    |                  |
|       | 00H00 | 1 | siège décomplété |                  |
| 21H15 | 22H45 | 0 | siège décomplété |                  |
| 14H24 | 15H16 | 1 | siège décomplété |                  |
| 16H30 | 18H15 | 1 | siège décomplété |                  |
|       | 00H56 | 1 | siège décomplété |                  |
| 10H15 | 11H10 | 1 | siège complet    |                  |
|       | 04H45 | 1 | siège décomplété |                  |
| 13H15 | 15H00 | 0 | siège décomplété |                  |
| 18H25 | 18H30 | 0 | siège décomplété |                  |
| 03H50 | 05H00 | 0 | siège complet    |                  |
| 15H00 | 16H20 | 0 | siège décomplété |                  |
| 02H45 | 02H53 | 0 | siège complet    |                  |
| 15H15 | 15H50 | 1 | siège complet    |                  |
|       | 13H10 | 1 | siège décomplété |                  |
| 08H30 | 09H30 | 1 | siège complet    |                  |
| 12H45 | 13H45 | 1 | siège décomplété |                  |
| 22H00 | 00H00 | 1 |                  | siège décomplété |
|       | 02H35 | 1 |                  | siège décomplété |
|       | 4:00  | 0 | complet          | siège complet    |

|       |       |   |                 |                  |
|-------|-------|---|-----------------|------------------|
|       | 13:30 | 0 | décomplété      | siège décomplété |
| 21:30 | 22:30 | 0 | complet         | siège complet    |
|       | 13:20 | 1 | complet         | siège décomplété |
|       | 17:38 | 0 | complet         | siège décomplété |
|       | 10:50 | 1 | décomplété      | siège complet    |
| 9:00  | 10:00 | 1 | décomplété      | siège complet    |
|       | 7:00  | 0 | complet         |                  |
|       | 18:15 | 1 | décomplété      |                  |
| 2:55  | 4:55  | 1 | complet         |                  |
| 9:15  | 10:15 | 1 | complet         |                  |
|       | 7:45  | 1 | décomplété      |                  |
| 9:15  | 10:15 | 1 | décomplété      |                  |
| 23:15 | 0:00  | 0 | décomplété      |                  |
| 12:00 | 14:05 | 1 | décomplété      |                  |
| 21:15 | 22:15 | 0 | complet         |                  |
|       | 2:30  | 0 | complet         |                  |
| 16:15 | 17:15 | 0 | décomplété      |                  |
| 3:45  | 5:00  | 0 | complet         |                  |
|       | 1:25  | 1 | décomplété      |                  |
|       | 3:10  | 1 | complet         |                  |
|       | 23:00 | 1 | semi-décomplété |                  |
|       | 3:00  | 0 | décomplété      |                  |
|       | 13:30 | 1 | complet         |                  |
| 15:00 | 16:10 | 1 | décomplété      |                  |
|       | 11:30 | 0 | décomplété      |                  |
|       | 12:00 | 1 | complet         |                  |
|       | 5:10  | 0 | complet         |                  |
| 6:45  | 6:55  | 0 | semi décomplété |                  |
| 15:40 | 15:50 | 0 | complet         |                  |
| 14:00 | 15:00 | 1 | complet         |                  |
| 12:40 | 13:00 | 1 | décomplété      |                  |
| 22:00 | 0:15  | 1 | complet         |                  |
| 12:30 | 13:30 | 1 | décomplété      |                  |
|       | 5:20  | 0 | décomplété      |                  |
|       | 6:45  | 1 | décomplété      |                  |
| 15:50 | 17:20 | 1 | semi décomplété |                  |
| 23:25 | 0:25  | 0 | décomplété      |                  |
| 18:10 | 20:00 | 1 | décomplété      |                  |
|       | 17:30 | 1 | complet         |                  |
| 3:00  | 3:50  | 1 | décomplété      |                  |
|       | 4:40  | 1 | décomplété      |                  |
| 16:30 | 16:53 | 0 | semi décomplété |                  |
|       | 17:10 | 1 | complet         |                  |

|       |       |   |                 |
|-------|-------|---|-----------------|
| 14:30 | 17:30 | 1 | décomplété      |
|       | 6:20  | 0 | semi décomplété |
|       | 4:30  | 1 | complet         |
|       | 0:40  | 0 | complet         |
| 7:00  | 8:00  | 1 | décomplété      |
| 21:45 | 22:45 | 1 | décomplété      |
