# Supplementary material for: Analysis of spontaneous labor progression of breech presentation at term
Source: PubMed Central journal article supplement (PMC8920216; doi:10.1371/journal.pone.0262002), 2022-03-14
Supplement: pone.0262002.s003.pdf [file pone.0262002.s003.pdf]

| age      | gestational age | BMI | gestity | parity | epidural analgesia |
|----------|-----------------|-----|---------|--------|--------------------|
| 26 years | 37.6            | 25  | 1       | 0      | 1                  |
| 32 years | 41              | 24  | 3       | 1      | 0                  |
| 36 years | 40              | 34  | 3       | 1      | 0                  |
| 31 years | 38              | 37  | 4       | 2      | 1                  |
| 40 years | 38.6            | 19  | 5       | 3      | 1                  |
| 36 years | 39.5            | 25  | 1       | 0      | 1                  |
| 37 years | 39.1            | 22  | 4       | 2      | 1                  |
| 29 years | 39.6            | 25  | 1       | 0      | 1                  |
| 30 years | 39.4            | 19  | 3       | 1      | 1                  |
| 29 years | 40.1            | 25  | 1       | 0      | 1                  |
| 31 years | 39.5            | 28  | 4       | 2      | 1                  |
| 40 years | 41.4            | 24  | 6       | 5      | 1                  |
| 26 years | 39              | 32  | 1       | 0      | 1                  |
| 34 years | 39.6            | 20  | 2       | 0      | 1                  |
| 31 years | 40.5            | 20  | 2       | 1      | 1                  |
| 33 years | 40              | 18  | 3       | 1      | 1                  |
| 26 years | 41.3            | 21  | 2       | 0      | 1                  |
| 30 years | 38.6            | 20  | 2       | 0      | 1                  |
| 27 years | 39.6            | 21  | 3       | 0      | 1                  |
| 28 years | 40.4            | 29  | 3       | 2      | 1                  |
| 31 years | 40.1            | 19  | 3       | 1      | 1                  |
| 32 years | 39.5            | 24  | 1       | 0      | 1                  |
| 21 years | 41.2            | 23  | 1       | 0      | 1                  |
| 22 years | 40.1            | 18  | 1       | 0      | 1                  |
| 42 years | 41.3            | 18  | 8       | 5      | 1                  |
| 33 years | 40.5            | 23  | 1       | 0      | 1                  |
| 32 years | 40.6            | 19  | 1       | 0      | 1                  |
| 31 years | 39.5            | 22  | 2       | 1      | 1                  |
| 42 years | 40.3            | 27  | 8       | 6      | 1                  |
| 24 years | 39.5            | 29  | 1       | 0      | 1                  |
| 41 years | 37              | 18  | 4       | 2      | 1                  |
| 37 years | 40.6            | 31  | 3       | 2      | 1                  |
| 37 years | 41.3            | 28  | 2       | 1      | 1                  |
| 25 years | 38.5            | 20  | 1       | 0      | 1                  |
| 28 years | 40.5            | 23  | 2       | 0      | 1                  |
| 42 years | 39.4            | 19  | 4       | 1      | 1                  |
| 42 years | 38.3            | 25  | 8       | 3      | 1                  |
| 27 years | 38.4            | 20  | 1       | 0      | 1                  |
| 28 years | 41.5            | 21  | 1       | 0      | 1                  |
| 34 years | 40              | 27  | 2       | 0      | 1                  |
| 29 years | 40.2            | 22  | 3       | 1      | 1                  |
| 35 years | 41.3            | 30  | 6       | 4      | 0                  |

|          |      |    |   |   |   |
|----------|------|----|---|---|---|
| 24 years | 38.3 | 24 | 3 | 2 | 1 |
| 36 years | 41.1 | 19 | 2 | 1 | 1 |
| 29 years | 39   | 20 | 1 | 0 | 1 |
| 32 years | 40.6 | 22 | 2 | 1 | 1 |
| 27 years | 39.1 | 23 | 2 | 1 | 1 |
| 34 years | 39.1 | 31 | 2 | 1 | 0 |
| 28 years | 40.1 | 24 | 1 | 0 | 1 |
| 26 years | 40.1 | 19 | 2 | 1 | 1 |
| 28 years | 40.1 | 20 | 5 | 2 | 1 |
| 28 years | 40.6 | 33 | 8 | 6 | 0 |
| 41 years | 39.4 | 27 | 2 | 1 | 1 |
| 33 years | 39.2 | 21 | 2 | 1 | 1 |
| 23 years | 39.5 | 19 | 1 | 0 | 1 |
| 31 years | 38.6 | 18 | 1 | 0 | 1 |
| 30 years | 39.5 | 24 | 1 | 0 | 1 |
| 30 years | 39.3 | 21 | 1 | 0 | 1 |
| 31 years | 37.6 | 20 | 3 | 2 | 1 |
| 30 years | 39.5 | 19 | 3 | 1 | 1 |
| 33 years | 40.3 | 22 | 2 | 1 | 1 |
| 33 years | 40.3 | 21 | 1 | 0 | 1 |
| 29 years | 39.2 | 21 | 1 | 0 | 1 |
| 33 years | 39.2 | 20 | 1 | 0 | 1 |
| 33 years | 39   | 21 | 4 | 3 | 1 |
| 22 years | 39.4 | 22 | 4 | 1 | 1 |
| 26 years | 40.4 | 32 | 2 | 1 | 1 |
| 27 years | 40   | 18 | 2 | 1 | 1 |
| 25 years | 40.3 | 17 | 1 | 0 | 1 |
| 33 years | 38.3 | 19 | 1 | 0 | 1 |
| 29 years | 37.2 | 25 | 1 | 0 | 1 |
| 26 years | 38.3 | 21 | 3 | 1 | 1 |
| 24 years | 37.2 | 30 | 1 | 0 | 1 |
| 27 years | 38.1 | 20 | 2 | 1 | 1 |
| 19 years | 39   | 24 | 1 | 0 | 1 |
| 30 years | 39.2 | 22 | 1 | 0 | 1 |
| 30 years | 40.1 | 19 | 1 | 0 | 1 |
| 33 years | 41.1 | 24 | 1 | 0 | 1 |
| 30 years | 37.5 | 18 | 2 | 0 | 1 |
| 29 years | 39.2 | 22 | 2 | 1 | 1 |
| 26 years | 41.1 | 0  | 4 | 2 | 1 |
| 37 years | 39.2 | 29 | 2 | 0 | 1 |
| 25 years | 39.5 | 18 | 1 | 0 | 1 |
| 34 years | 41.1 | 26 | 4 | 2 | 1 |
| 32 years | 39.6 | 16 | 1 | 0 | 1 |

|          |      |    |   |   |   |
|----------|------|----|---|---|---|
| 26 years | 38.2 | 25 | 1 | 0 | 1 |
| 34 years | 40.1 | 21 | 3 | 2 | 1 |
| 41 years | 40.6 | 21 | 3 | 1 | 1 |
| 36 years | 39.1 | 35 | 4 | 2 | 1 |
| 34 years | 41.3 | 19 | 2 | 1 | 1 |
| 34 years | 38.3 | 18 | 2 | 0 | 1 |
| 41 years | 39.1 | 20 | 2 | 1 | 1 |
| 40 years | 38.5 | 19 | 5 | 2 | 1 |
| 28 years | 41.2 | 23 | 1 | 0 | 1 |
| 27 years | 40.1 | 27 | 1 | 0 | 1 |
| 27 years | 40.5 | 22 | 1 | 0 | 1 |
| 36 years | 40.3 | 22 | 3 | 2 | 1 |
| 32 years | 39.4 | 22 | 1 | 0 | 1 |
| 29 years | 40.6 | 22 | 2 | 1 | 1 |
| 31 years | 38.6 | 21 | 1 | 0 | 1 |
| 36 years | 40.5 | 20 | 3 | 0 | 1 |
| 31 years | 40.4 | 22 | 2 | 0 | 1 |
| 30 years | 40.6 | 40 | 2 | 1 | 1 |
| 31 years | 39.3 | 19 | 1 | 0 | 1 |
| 28 years | 40.4 | 24 | 1 | 0 | 1 |
| 22 years | 39.2 | 35 | 1 | 0 | 1 |
| 28 years | 39.2 | 24 | 4 | 3 | 1 |
| 27 years | 40.1 | 19 | 1 | 0 | 1 |
| 27 years | 41.1 | 21 | 2 | 1 | 1 |
| 31 years | 37.6 | 18 | 1 | 0 | 1 |
| 29 years | 40   | 21 | 2 | 1 | 1 |
| 28 years | 40   | 36 | 1 | 0 | 1 |
| 29 years | 40   | 20 | 1 | 0 | 1 |
| 37 years | 39   | 35 | 1 | 0 | 1 |
| 28 years | 38.1 | 19 | 1 | 0 | 1 |
| 20 years | 38.4 | 22 | 1 | 0 | 1 |
| 31 years | 41.1 | 40 | 2 | 1 | 1 |
| 35 years | 40.1 | 17 | 3 | 2 | 1 |
| 28 years | 40.5 | 20 | 5 | 2 | 0 |
| 29 years | 37.1 | 25 | 3 | 1 | 1 |
| 26 years | 39.2 | 19 | 5 | 4 | 1 |
| 35 years | 40.6 | 23 | 4 | 1 | 1 |
| 34 years | 37.2 | 18 | 2 | 1 | 1 |
| 39 years | 41.1 | 22 | 6 | 1 | 1 |
| 35 years | 41.1 | 23 | 1 | 0 | 1 |
| 36 years | 37.5 | 31 | 6 | 5 | 1 |
| 32 years | 39.1 | 36 | 4 | 1 | 1 |
| 31 years | 39   | 26 | 2 | 1 | 1 |

|          |      |    |   |   |   |
|----------|------|----|---|---|---|
| 27 years | 38.1 | 21 | 1 | 0 | 1 |
| 34 years | 40.1 | 24 | 2 | 0 | 1 |
| 33 years | 37.1 | 32 | 8 | 7 | 1 |
| 30 years | 39.4 | 29 | 1 | 0 | 1 |
| 28 years | 39.1 | 19 | 1 | 0 | 1 |
| 33 years | 39.5 | 21 | 2 | 0 | 1 |
| 24 years | 39.3 | 23 | 1 | 0 | 1 |
| 36 years | 39.2 | 19 | 3 | 1 | 1 |
| 27 years | 40.3 | 29 | 2 | 0 | 1 |
| 32 years | 41.1 | 27 | 1 | 0 | 1 |
| 36 years | 37.2 | 22 | 2 | 0 | 1 |
| 42 years | 39.6 | 25 | 4 | 3 | 1 |
| 23 years | 40.5 | 26 | 1 | 0 | 1 |
| 30 years | 40.2 | 22 | 1 | 0 | 1 |
| 32 years | 40.1 | 20 | 2 | 1 | 1 |
| 31 years | 40.6 | 21 | 1 | 0 | 1 |
| 26 years | 37.2 | 25 | 1 | 0 | 1 |
| 32 years | 40.1 | 23 | 4 | 3 | 1 |
| 28 years | 40.2 | 31 | 3 | 2 | 1 |
| 29 years | 39.6 | 19 | 1 | 0 | 1 |
| 26 years | 40.4 | 20 | 1 | 0 | 1 |
| 34 years | 40.4 | 20 | 2 | 1 | 1 |
| 28 years | 40.6 | 27 | 1 | 0 | 1 |
| 35 years | 40.1 | 23 | 1 | 0 | 1 |
| 28 years | 37.2 | 24 | 6 | 4 | 1 |
| 26 years | 40.2 | 29 | 1 | 0 | 0 |
| 33 years | 39.5 | 25 | 2 | 1 | 1 |
| 39 years | 38.4 | 23 | 3 | 2 | 1 |
| 28 years | 40.5 | 21 | 2 | 1 | 1 |
| 19 years | 38   | 18 | 2 | 0 | 1 |
| 24 years | 37.6 | 20 | 2 | 1 | 1 |
| 25 years | 40.4 | 22 | 1 | 0 | 1 |
| 24 years | 39.5 | 19 | 4 | 1 | 1 |
| 27 years | 39.3 | 21 | 2 | 1 | 1 |
| 32 years | 40.2 | 22 | 4 | 0 | 1 |
| 25 years | 38.5 | 25 | 1 | 0 | 1 |
| 28 years | 40.6 | 17 | 1 | 0 | 1 |
| 30 years | 38.2 | 19 | 6 | 2 | 1 |
| 31 years | 38.1 | 22 | 2 | 0 | 1 |
| 36 years | 39.3 | 20 | 1 | 0 | 1 |
| 29 years | 39.4 | 20 | 1 | 0 | 1 |
| 26 years | 39.2 | 34 | 1 | 0 | 1 |
| 19 years | 39.5 | 25 | 4 | 0 | 1 |

|          |      |    |   |   |   |
|----------|------|----|---|---|---|
| 30 years | 37.4 | 23 | 1 | 0 | 1 |
| 25 years | 40.5 | 24 | 2 | 2 | 1 |
| 24 years | 39.6 | 19 | 2 | 1 | 1 |
| 33 years | 38.6 | 19 | 2 | 0 | 1 |
| 26 years | 40.3 | 21 | 1 | 0 | 1 |
| 20 years | 41.1 | 36 | 2 | 0 | 1 |
| 31 years | 38.6 | 21 | 2 | 0 | 1 |
| 32 years | 40.2 | 19 | 5 | 4 | 1 |
| 26 years | 38.5 | 21 | 6 | 3 | 0 |
| 38 years | 38.3 | 25 | 4 | 2 | 1 |
| 32 years | 39.1 | 21 | 1 | 0 | 1 |
| 39 years | 40.2 | 35 | 8 | 4 | 0 |
| 39 years | 41.4 | 21 | 5 | 2 | 1 |
| 37 years | 38.1 | 24 | 2 | 1 | 1 |
| 26 years | 41.3 | 28 | 2 | 1 | 1 |
| 28 years | 39.2 | 27 | 3 | 0 | 1 |
| 28 years | 40.4 | 19 | 1 | 0 | 1 |
| 26 years | 40.1 | 20 | 1 | 0 | 1 |
| 27 years | 39.6 | 21 | 1 | 0 | 1 |
| 39 years | 39.1 | 18 | 1 | 0 | 1 |
| 32 years | 39.1 | 20 | 2 | 1 | 1 |
| 30 years | 39.2 | 21 | 1 | 0 | 1 |
| 35 years | 40.6 | 24 | 3 | 0 | 1 |
| 28 years | 41   | 20 | 1 | 0 | 1 |
| 32 years | 39.4 | 19 | 3 | 1 | 1 |
| 27 years | 38.4 | 29 | 2 | 1 | 1 |
| 35 years | 39.6 | 23 | 5 | 3 | 1 |
| 31 years | 37.3 | 21 | 1 | 0 | 1 |
| 21 years | 39.1 | 24 | 4 | 1 | 1 |
| 29 years | 40.1 | 25 | 5 | 4 | 1 |
| 27 years | 41   | 20 | 1 | 0 | 1 |
| 31 years | 41.4 | 19 | 2 | 1 | 1 |
| 36 years | 40.1 | 16 | 2 | 1 | 0 |
| 29 years | 38.5 | 21 | 1 | 0 | 1 |
| 20 years | 38.3 | 18 | 1 | 0 | 1 |
| 23 years | 40.3 | 21 | 3 | 0 | 1 |
| 33 years | 38.1 | 23 | 1 | 0 | 1 |
| 22 years | 40.6 | 24 | 1 | 0 | 1 |
| 29 years | 41.1 | 20 | 2 | 1 | 1 |
| 28 years | 41   | 20 | 2 | 0 | 1 |
| 30 years | 38.2 | 18 | 1 | 0 | 1 |
| 30 years | 40.4 | 21 | 2 | 1 | 1 |
| 37 years | 41.6 | 24 | 3 | 2 | 1 |

|          |      |    |   |   |   |
|----------|------|----|---|---|---|
| 35 years | 37.1 | 18 | 3 | 1 | 1 |
| 32 years | 41.2 | 22 | 3 | 1 | 0 |
| 38 years | 41.1 | 23 | 1 | 0 | 1 |
| 29 years | 39   | 18 | 1 | 0 | 1 |
| 30 years | 39.2 | 20 | 2 | 1 | 1 |
| 32 years | 39.3 | 22 | 3 | 0 | 1 |
| 20 years | 39.2 | 26 | 1 | 0 | 1 |
| 20 years | 39   | 28 | 2 | 0 | 1 |
| 25 years | 40.3 | 23 | 2 | 0 | 1 |
| 25 years | 40.3 | 20 | 2 | 0 | 1 |
| 32 years | 39.3 | 22 | 1 | 0 | 1 |
| 36 years | 39.4 | 18 | 1 | 0 | 1 |
| 35 years | 39.6 | 17 | 3 | 1 | 1 |
| 29 years | 38.3 | 20 | 2 | 0 | 1 |
| 28 years | 39.6 | 23 | 1 | 0 | 1 |
| 26 years | 38   | 30 | 1 | 0 | 1 |
| 33 years | 40.6 | 20 | 3 | 1 | 1 |
| 30 years | 41.1 | 24 | 1 | 0 | 1 |
| 31 years | 39.2 | 21 | 2 | 1 | 1 |
| 22 years | 37.4 | 20 | 2 | 1 | 1 |
| 29 years | 39.3 | 22 | 2 | 1 | 1 |
| 33 years | 37.4 | 19 | 1 | 0 | 1 |
| 24 years | 38.6 | 20 | 1 | 0 | 1 |
| 30 years | 40.2 | 18 | 1 | 0 | 1 |
| 20 years | 38.2 | 19 | 2 | 1 | 1 |
| 24 years | 38.3 | 23 | 2 | 1 | 1 |
| 28 years | 41   | 22 | 3 | 1 | 1 |
| 30 years | 41   | 28 | 4 | 3 | 1 |
| 33 years | 38.3 | 30 | 1 | 0 | 1 |
| 29 years | 40.2 | 18 | 2 | 1 | 1 |
| 30 years | 38.1 | 17 | 7 | 2 | 1 |
| 37 years | 38.2 | 19 | 2 | 1 | 1 |
| 27 years | 40.2 | 19 | 1 | 0 | 1 |
| 31 years | 39.4 | 29 | 7 | 5 | 1 |
| 31 years | 39.1 | 22 | 1 | 0 | 1 |
| 33 years | 39.3 | 23 | 2 | 1 | 1 |
| 26 years | 40   | 20 | 3 | 2 | 1 |
| 28 years | 39   | 21 | 1 | 0 | 1 |
| 27 years | 40.6 | 23 | 1 | 0 | 1 |
| 33 years | 39.5 | 24 | 4 | 3 | 1 |
| 33 years | 38.4 | 24 | 3 | 1 | 1 |
| 36 years | 39.6 | 25 | 3 | 2 | 1 |
| 28 years | 38.1 | 22 | 2 | 0 | 1 |

|          |      |    |   |   |   |
|----------|------|----|---|---|---|
| 34 years | 39.1 | 27 | 2 | 1 | 1 |
| 28 years | 40   | 17 | 2 | 1 | 1 |
| 32 years | 41   | 21 | 3 | 0 | 1 |
| 34 years | 38   | 25 | 1 | 0 | 1 |
| 27 years | 39.5 | 22 | 1 | 0 | 1 |
| 33 years | 39.1 | 21 | 1 | 0 | 1 |
| 25 years | 37.2 | 22 | 1 | 0 | 1 |
| 30 years | 39.5 | 20 | 1 | 0 | 1 |
| 27 years | 40.6 | 20 | 1 | 0 | 1 |
| 26 years | 38   | 19 | 1 | 0 | 1 |
| 33 years | 41.1 | 26 | 1 | 0 | 1 |
| 26 years | 39.3 | 26 | 1 | 0 | 1 |
| 39 years | 41   | 24 | 1 | 0 | 1 |
| 33 years | 39   | 25 | 3 | 2 | 1 |
| 33 years | 40.4 | 21 | 2 | 1 | 1 |
| 28 years | 40.5 | 21 | 1 | 0 | 1 |
| 23 years | 39.4 | 25 | 1 | 0 | 1 |
| 29 years | 39.6 | 21 | 2 | 1 | 0 |
| 33 years | 39.6 | 23 | 2 | 0 | 1 |
| 22 years | 40.3 | 21 | 2 | 1 | 1 |
| 31 years | 38.6 | 21 | 1 | 0 | 1 |
| 27 years | 38.5 | 22 | 2 | 1 | 1 |
| 30 years | 37.3 | 18 | 1 | 0 | 1 |
| 38 years | 39.6 | 20 | 5 | 1 | 1 |
| 30 years | 39.2 | 30 | 7 | 3 | 1 |
| 32 years | 39.2 | 27 | 3 | 1 | 1 |
| 27 years | 38.1 | 32 | 1 | 0 | 1 |
| 29 years | 41.1 | 23 | 2 | 1 | 1 |
| 28 years | 40.2 | 18 | 1 | 0 | 1 |
| 34 years | 39.3 | 25 | 2 | 0 | 1 |
| 26 years | 39   | 23 | 1 | 0 | 1 |
| 34 years | 38   | 17 | 4 | 2 | 1 |
| 29 years | 39.2 | 20 | 6 | 1 | 1 |
| 24 years | 38.2 | 23 | 1 | 0 | 1 |
| 28 years | 39   | 25 | 1 | 0 | 1 |
| 39 years | 39   | 24 | 4 | 2 | 1 |
| 33 years | 40.5 | 24 | 5 | 4 | 1 |
| 19 years | 38.5 | 23 | 1 | 0 | 1 |
| 35 years | 39.4 | 22 | 5 | 2 | 1 |
| 27 years | 39.4 | 22 | 1 | 0 | 1 |
| 27 years | 39   | 22 | 1 | 0 | 1 |
| 35 years | 41   | 31 | 2 | 0 | 1 |
| 30 years | 37.5 | 19 | 4 | 0 | 1 |

|          |      |    |   |   |   |
|----------|------|----|---|---|---|
| 31 years | 37.3 | 27 | 2 | 1 | 1 |
| 32 years | 37.3 | 26 | 2 | 1 | 1 |
| 34 years | 39.6 | 19 | 2 | 1 | 0 |
| 27 years | 37.3 | 22 | 1 | 0 | 1 |
| 28 years | 40.4 | 23 | 1 | 0 | 1 |
| 34 years | 39.2 | 19 | 3 | 1 | 1 |
| 33 years | 37   | 24 | 2 | 0 | 1 |
| 32 years | 39.5 | 23 | 2 | 0 | 1 |
| 32 years | 39   | 0  | 2 | 1 | 1 |
| 33 years | 37.3 | 23 | 4 | 2 | 1 |
| 33 years | 41.1 | 21 | 1 | 0 | 1 |
| 24 years | 40   | 21 | 2 | 0 | 1 |
| 20 years | 41   | 36 | 3 | 1 | 1 |
| 35 years | 38.3 | 23 | 3 | 1 | 1 |
| 36 years | 40   | 19 | 1 | 0 | 1 |
| 34 years | 41.3 | 18 | 3 | 2 | 1 |
| 44 years | 38.6 | 28 | 4 | 3 | 1 |
| 21 years | 40.2 | 19 | 3 | 2 | 1 |
| 36 years | 40.1 | 34 | 2 | 1 | 1 |
| 24 years | 39.1 | 17 | 1 | 0 | 1 |
| 32 years | 37.1 | 21 | 1 | 0 | 1 |
| 15 years | 39.1 | 0  | 1 | 0 | 1 |
| 31 years | 37.3 | 25 | 3 | 2 | 1 |
| 24 years | 39.5 | 28 | 6 | 4 | 1 |
| 29 years | 38.4 | 23 | 1 | 0 | 1 |
| 30 years | 40   | 22 | 2 | 1 | 1 |
| 31 years | 39.5 | 20 | 3 | 1 | 0 |
| 31 years | 40.3 | 21 | 3 | 2 | 0 |
| 30 years | 40.5 | 18 | 2 | 1 | 1 |
| 31 years | 38   | 30 | 3 | 1 | 1 |
| 28 years | 37.6 | 27 | 2 | 0 | 1 |
| 34 years | 40.6 | 20 | 5 | 1 | 1 |
| 34 years | 38.5 | 24 | 1 | 0 | 1 |
| 27 years | 39.6 | 19 | 3 | 1 | 1 |
| 36 years | 41.3 | 21 | 2 | 1 | 1 |
| 34 years | 37.1 | 20 | 2 | 1 | 1 |
| 32 years | 41.1 | 25 | 1 | 0 | 1 |
| 26 years | 40.1 | 27 | 6 | 2 | 1 |
| 36 years | 41.1 | 24 | 2 | 1 | 1 |
| 35 years | 39.4 | 36 | 2 | 1 | 1 |
| 29 years | 40.5 | 21 | 1 | 0 | 1 |
| 30 years | 37.1 | 23 | 1 | 0 | 1 |
| 34 years | 39.5 | 19 | 2 | 0 | 1 |



|          |      |    |   |   |   |
|----------|------|----|---|---|---|
| 30 years | 39.6 | 19 | 3 | 1 | 0 |
| 35 years | 41.4 | 24 | 2 | 1 | 1 |
| 30 years | 40.3 | 20 | 1 | 0 | 1 |
| 35 years | 40.3 | 31 | 2 | 0 | 1 |
| 27 years | 37   | 26 | 2 | 0 | 1 |

| breech presentation | episiotomy | Birth injury perineum | n bith weightlead | circumfe |
|---------------------|------------|-----------------------|-------------------|----------|
| franck              | 0          | First degree          | 3260              | 36.5     |
| franck              | 0          |                       | 3000              | 0        |
| complete            | 0          |                       | 3800              | 34       |
| franck              | 0          |                       | 3030              | 34.5     |
| franck              | 0          | Second Degree         | 3130              | 35       |
| franck              | 0          | First degree          | 3030              | 36       |
| complete            | 0          |                       | 3240              | 33.5     |
| franck              | 0          |                       | 3310              | 33.5     |
| franck              | 0          | First degree          | 3220              | 35       |
| franck              | 0          | First degree          | 3290              | 35       |
| complete            | 0          |                       | 3400              | 31       |
| complete            | 0          |                       | 2260              | 32       |
| franck              | 0          | First degree          | 2950              | 36       |
| franck              | 0          |                       | 3020              | 34.5     |
| franck              | 0          |                       | 3350              | 33       |
| franck              | 1          |                       | 2550              | 33.5     |
| franck              | 0          | Second Degree         | 3320              | 34       |
| franck              | 0          |                       | 2610              | 33.5     |
| franck              | 0          | First degree          | 3340              | 34.5     |
| franck              | 0          |                       | 3650              | 35.5     |
| complete            | 0          | First degree          | 2830              | 34       |
| franck              | 1          |                       | 2680              | 34       |
| franck              | 0          | Second Degree         | 3100              | 34       |
| franck              | 0          |                       | 2870              | 34       |
| franck              | 0          |                       | 2790              | 34       |
| franck              | 1          |                       | 3070              | 35       |
| franck              | 0          | First degree          | 3100              | 36       |
| franck              | 0          |                       | 3070              | 34       |
| franck              | 0          |                       | 3270              | 33.5     |
| franck              | 0          |                       | 2930              | 35       |
| franck              | 0          |                       | 2510              | 31       |
| complete            | 0          |                       | 3710              | 37       |
| franck              | 0          | First degree          | 3440              | 35       |
| franck              | 0          |                       | 2500              | 34       |
| franck              | 0          |                       | 2870              | 34.5     |
| complete            | 0          | First degree          | 2930              | 33       |
| franck              | 0          |                       | 2950              | 30       |
| franck              | 0          |                       | 2750              | 34       |
| franck              | 0          | Second Degree         | 3710              | 37.5     |
| complete            | 0          |                       | 2940              | 34       |
| franck              | 0          |                       | 3040              | 35       |
| complete            | 0          |                       | 3280              | 34       |

|          |   |               |      |      |
|----------|---|---------------|------|------|
| complete | 0 |               | 3010 | 34   |
| franck   | 0 | Second Degree | 3360 | 33.5 |
| franck   | 0 |               | 2760 | 34   |
| franck   | 0 |               | 3380 | 36.5 |
| franck   | 0 |               | 3320 | 36   |
| complete | 0 | First degree  | 2750 | 34.5 |
| franck   | 0 | First degree  | 3370 | 35.5 |
| franck   | 0 | Second Degree | 3430 | 34   |
| franck   | 0 | Third Degree  | 3680 | 36   |
| complete | 0 |               | 3030 | 35   |
| franck   | 0 | Second Degree | 3540 | 35   |
| franck   | 0 |               | 3120 | 35.5 |
| complete | 0 |               | 2340 | 32.5 |
| franck   | 1 |               | 3200 | 35.5 |
| franck   | 1 |               | 2940 | 0    |
| complete | 1 | Second Degree | 3020 | 35   |
| complete | 0 | First degree  | 3150 | 35.5 |
| franck   | 0 |               | 2980 | 35   |
| complete | 0 |               | 2310 | 32   |
| franck   | 1 |               | 2750 | 33   |
| franck   | 0 |               | 3290 | 36   |
| franck   | 0 | Second Degree | 2980 | 33   |
| franck   | 0 |               | 2860 | 34.5 |
| complete | 0 |               | 3080 | 34.5 |
| complete | 0 | First degree  | 3660 | 37   |
| complete | 0 |               | 2850 | 33   |
| complete | 0 | First degree  | 2860 | 33   |
| franck   | 0 |               | 3010 | 35   |
| franck   | 1 |               | 2320 | 32.5 |
| franck   | 0 |               | 2990 | 32   |
| complete | 0 | First degree  | 3770 | 35   |
| franck   | 0 |               | 2950 | 37   |
| franck   | 0 |               | 2510 | 34   |
| franck   | 1 |               | 3760 | 36   |
| franck   | 1 |               | 3040 | 36   |
| franck   | 0 | Second Degree | 3240 | 36   |
| franck   | 0 |               | 2820 | 33   |
| complete | 0 |               | 3070 | 34   |
| complete | 0 |               | 3020 | 35   |
| complete | 0 | First degree  | 3115 | 33   |
| franck   | 0 |               | 2785 | 33   |
| franck   | 0 |               | 3150 | 34.5 |
| franck   | 0 |               | 3190 | 33   |

|          |   |              |      |      |
|----------|---|--------------|------|------|
| franck   | 0 |              | 2700 | 34.5 |
| complete | 0 |              | 3200 | 35   |
| complete | 0 |              | 3115 | 34.5 |
| franck   | 0 |              | 2870 | 34   |
| franck   | 0 |              | 3075 | 35   |
| franck   | 0 |              | 2990 | 35.5 |
| franck   | 0 |              | 3025 | 34   |
| complete | 0 | First degree | 3150 | 34   |
| complete | 0 | First degree | 3510 | 35.5 |
| complete | 0 |              | 3400 | 36   |
| franck   | 0 | First degree | 3130 | 36   |
| franck   | 0 |              | 3280 | 35   |
| complete | 0 |              | 3050 | 35   |
| complete | 0 |              | 4000 | 35   |
| franck   | 0 |              | 3015 | 34.5 |
| franck   | 0 | First degree | 3125 | 34.5 |
| complete | 0 |              | 3150 | 0    |
| complete | 0 |              | 3760 | 35   |
| franck   | 0 | First degree | 2880 | 34   |
| franck   | 0 |              | 4100 | 39   |
| complete | 0 |              | 3400 | 35.5 |
| complete | 0 |              | 3200 | 33   |
| complete | 0 |              | 4090 | 35   |
| franck   | 1 |              | 3140 | 34.5 |
| franck   | 1 |              | 3070 | 34   |
| franck   | 0 |              | 2680 | 33   |
| complete | 0 |              | 3035 | 33.5 |
| complete | 0 |              | 3075 | 35   |
| franck   | 0 |              | 2570 | 31   |
| complete | 0 |              | 2150 | 32   |
| franck   | 0 |              | 2395 | 32   |
| franck   | 0 | First degree | 3600 | 37   |
| franck   | 0 |              | 2870 | 35   |
| franck   | 0 |              | 3300 | 35.5 |
| franck   | 0 |              | 2900 | 35   |
| franck   | 0 |              | 3390 | 37   |
| complete | 0 |              | 3890 | 39   |
| franck   | 0 |              | 3070 | 35   |
| complete | 0 |              | 3125 | 34   |
| franck   | 0 |              | 3440 | 36   |
| complete | 0 |              | 2945 | 33   |
| franck   | 0 |              | 2990 | 36   |
| complete | 0 |              | 3210 | 35   |

|          |   |               |      |      |
|----------|---|---------------|------|------|
| complete | 0 |               | 3060 | 33.5 |
| franck   | 0 | Second Degree | 3410 | 35.5 |
| franck   | 0 |               | 2590 | 33   |
| franck   | 0 |               | 3760 | 37   |
| complete | 0 | Second Degree | 2650 | 33   |
| franck   | 0 |               | 2650 | 33   |
| franck   | 1 |               | 3600 | 34   |
| complete | 0 |               | 3160 | 35   |
| complete | 0 |               | 2880 | 34.5 |
| franck   | 0 | Second Degree | 2700 | 33   |
| franck   | 0 |               | 2460 | 37   |
| franck   | 0 |               | 3770 | 36   |
| franck   | 0 |               | 3090 | 34   |
| franck   | 0 | First degree  | 2740 | 34.5 |
| franck   | 0 |               | 3340 | 36   |
| franck   | 0 |               | 2770 | 34.5 |
| franck   | 0 | First degree  | 2330 | 31   |
| franck   | 0 |               | 2780 | 33.5 |
| franck   | 0 |               | 3280 | 34   |
| franck   | 0 | First degree  | 3620 | 36   |
| franck   | 0 |               | 2910 | 35   |
| complete | 0 |               | 3820 | 35   |
| franck   | 0 | First degree  | 3260 | 37   |
| franck   | 0 |               | 2910 | 35   |
| franck   | 0 |               | 3300 | 34   |
| franck   | 0 | First degree  | 2980 | 34.5 |
| complete | 0 |               | 2870 | 33.5 |
| complete | 0 |               | 2860 | 32   |
| franck   | 0 |               | 3650 | 36   |
| complete | 0 |               | 2450 | 33   |
| complete | 0 |               | 3080 | 33   |
| franck   | 0 | Second Degree | 2830 | 34   |
| complete | 0 |               | 3370 | 34   |
| complete | 0 |               | 2250 | 32   |
| franck   | 0 |               | 2620 | 33.5 |
| franck   | 0 |               | 3130 | 35   |
| franck   | 1 |               | 2600 | 34   |
| franck   | 0 |               | 2400 | 33.5 |
| complete | 0 |               | 2780 | 34   |
| complete | 0 |               | 3015 | 33   |
| franck   | 0 |               | 2890 | 35   |
| franck   | 0 | First degree  | 3100 | 34.5 |
| franck   | 0 | First degree  | 2490 | 0    |

|          |   |               |      |      |
|----------|---|---------------|------|------|
| franck   | 1 |               | 2620 | 33.5 |
| franck   | 0 | Second Degree | 3700 | 35.5 |
| complete | 0 |               | 2800 | 35.5 |
| complete | 0 |               | 3080 | 35   |
| franck   | 0 |               | 3230 | 34.5 |
| franck   | 0 |               | 3640 | 36.5 |
| complete | 0 |               | 3260 | 35   |
| complete | 0 |               | 2790 | 36   |
| franck   | 0 |               | 3410 | 34   |
| franck   | 0 |               | 3260 | 36.5 |
| franck   | 0 |               | 3710 | 36.5 |
| complete | 0 |               | 3280 | 35   |
| franck   | 0 |               | 4310 | 38.5 |
| franck   | 0 |               | 2280 | 32.5 |
| franck   | 0 |               | 3260 | 35.5 |
| complete | 0 |               | 3170 | 34   |
| franck   | 0 |               | 2960 | 35   |
| franck   | 0 | Second Degree | 3280 | 35.5 |
| complete | 0 |               | 2650 | 34   |
| franck   | 1 | Third Degree  | 2680 | 35   |
| franck   | 0 |               | 3560 | 36   |
| complete | 0 | First degree  | 2740 | 33   |
| franck   | 0 |               | 2870 | 34.5 |
| complete | 0 |               | 3310 | 33   |
| complete | 0 |               | 2750 | 34   |
| franck   | 0 |               | 3050 | 35.5 |
| complete | 0 |               | 4000 | 36.5 |
| franck   | 0 |               | 3150 | 34   |
| franck   | 0 |               | 3140 | 33.5 |
| franck   | 0 |               | 3490 | 35   |
| complete | 0 |               | 3490 | 34   |
| franck   | 0 |               | 3220 | 36   |
| franck   | 0 |               | 2745 | 33   |
| franck   | 0 | First degree  | 3310 | 35   |
| franck   | 0 |               | 2460 | 32   |
| franck   | 0 |               | 2660 | 34   |
| franck   | 0 |               | 3070 | 33   |
| franck   | 0 |               | 3490 | 33.5 |
| franck   | 0 |               | 3720 | 36.5 |
| franck   | 0 | Second Degree | 2770 | 34   |
| franck   | 0 |               | 2520 | 33   |
| complete | 0 |               | 3740 | 35   |
| franck   | 0 |               | 3490 | 37   |

|          |   |               |      |      |
|----------|---|---------------|------|------|
| franck   | 0 |               | 2540 | 33   |
| franck   | 0 | First degree  | 4090 | 37   |
| franck   | 0 |               | 3470 | 36.5 |
| complete | 0 | Second Degree | 2880 | 36   |
| franck   | 0 | Third Degree  | 3130 | 34.5 |
| franck   | 1 |               | 2800 | 36   |
| franck   | 0 |               | 2930 | 33.5 |
| complete | 0 |               | 3870 | 36   |
| franck   | 1 | Fourth Degree | 2670 | 33   |
| franck   | 0 |               | 3700 | 0    |
| franck   | 0 | Second Degree | 2690 | 34   |
| franck   | 0 |               | 2950 | 34.5 |
| complete | 0 |               | 2440 | 34   |
| franck   | 0 |               | 2310 | 34.5 |
| franck   | 0 |               | 3140 | 33.5 |
| franck   | 0 | Second Degree | 3350 | 35   |
| franck   | 0 | First degree  | 3240 | 35.5 |
| franck   | 0 |               | 3250 | 35.5 |
| complete | 0 |               | 3430 | 34   |
| franck   | 0 |               | 2430 | 31.5 |
| complete | 0 |               | 3430 | 34   |
| franck   | 0 |               | 2960 | 34.5 |
| complete | 0 |               | 2560 | 35   |
| franck   | 0 | Second Degree | 3700 | 35   |
| complete | 0 |               | 2880 | 33   |
| complete | 0 |               | 2350 | 33   |
| complete | 0 |               | 3850 | 36   |
| complete | 0 | First degree  | 3325 | 36   |
| complete | 0 |               | 2700 | 34   |
| franck   | 0 | First degree  | 4020 | 36   |
| complete | 0 |               | 2500 | 32   |
| complete | 0 | First degree  | 3070 | 34   |
| franck   | 1 |               | 3320 | 34.5 |
| franck   | 0 |               | 3080 | 36   |
| franck   | 0 |               | 3045 | 34.5 |
| franck   | 0 | First degree  | 3150 | 36   |
| franck   | 0 |               | 3290 | 34   |
| complete | 0 | First degree  | 2400 | 33   |
| franck   | 0 |               | 3480 | 35.5 |
| complete | 0 |               | 2790 | 33   |
| franck   | 0 |               | 3680 | 36   |
| franck   | 0 |               | 3575 | 36   |
| franck   | 0 | Second Degree | 2880 | 34   |

|          |   |               |      |      |
|----------|---|---------------|------|------|
| franck   | 0 |               | 3100 | 34   |
| complete | 0 |               | 3540 | 34.5 |
| franck   | 0 |               | 3290 | 33   |
| franck   | 0 |               | 2770 | 34   |
| franck   | 1 | Third Degree  | 3120 | 34   |
| franck   | 0 |               | 2765 | 35   |
| franck   | 0 |               | 2335 | 32   |
| franck   | 0 | First degree  | 2970 | 33.5 |
| franck   | 0 |               | 3680 | 35.5 |
| franck   | 0 |               | 2880 | 34   |
| complete | 0 |               | 4190 | 36   |
| complete | 0 | First degree  | 3110 | 35   |
| franck   | 1 |               | 2520 | 34   |
| complete | 0 |               | 2760 | 36   |
| franck   | 0 | First degree  | 3050 | 34   |
| franck   | 0 |               | 2490 | 33.5 |
| franck   | 0 | First degree  | 2970 | 34   |
| complete | 0 |               | 3400 | 33.5 |
| franck   | 0 | Third Degree  | 3780 | 37   |
| franck   | 0 |               | 3290 | 35   |
| franck   | 0 | Second Degree | 3270 | 34   |
| franck   | 0 |               | 2545 | 33   |
| franck   | 0 |               | 2600 | 32   |
| franck   | 0 |               | 3780 | 36   |
| complete | 0 |               | 3000 | 35   |
| franck   | 0 |               | 3290 | 35.5 |
| franck   | 0 |               | 2690 | 34   |
| franck   | 0 |               | 4200 | 36.5 |
| franck   | 0 |               | 3875 | 34.5 |
| complete | 0 |               | 3020 | 35.5 |
| complete | 0 |               | 3390 | 35   |
| franck   | 0 |               | 3180 | 36   |
| complete | 0 |               | 3150 | 31.5 |
| franck   | 0 |               | 3070 | 32.5 |
| franck   | 0 |               | 2630 | 32.5 |
| complete | 0 | Second Degree | 3070 | 35   |
| franck   | 0 |               | 3650 | 36   |
| complete | 0 |               | 2360 | 30   |
| franck   | 0 |               | 3350 | 36   |
| franck   | 0 |               | 2860 | 34   |
| complete | 0 |               | 2990 | 34   |
| complete | 0 | First degree  | 3500 | 36   |
| franck   | 0 |               | 2500 | 31   |



|          |   |               |      |      |
|----------|---|---------------|------|------|
| complete | 0 |               | 2490 | 33   |
| complete | 0 |               | 2420 | 32.5 |
| complete | 0 |               | 2660 | 34   |
| franck   | 0 |               | 2210 | 33.5 |
| franck   | 0 |               | 3220 | 35.5 |
| complete | 0 |               | 2770 | 32.5 |
| franck   | 0 |               | 2400 | 32.5 |
| franck   | 1 | Second Degree | 3470 | 35   |
| complete | 0 |               | 3900 | 35.5 |
| franck   | 0 |               | 2570 | 33   |
| franck   | 0 |               | 3590 | 36   |
| franck   | 0 |               | 2750 | 33   |
| franck   | 0 |               | 3490 | 34   |
| complete | 0 | Second Degree | 3310 | 33.5 |
| complete | 0 |               | 2890 | 33   |
| franck   | 0 | First degree  | 4100 | 37   |
| complete | 0 |               | 3210 | 33   |
| franck   | 0 |               | 3280 | 35   |
| complete | 0 |               | 2620 | 32   |
| franck   | 1 |               | 3500 | 35   |
| franck   | 0 |               | 2745 | 34   |
| franck   | 0 |               | 2750 | 34   |
| franck   | 0 |               | 3155 | 36   |
| franck   | 0 |               | 3320 | 34   |
| franck   | 0 | First degree  | 3110 | 36   |
| complete | 0 | Third Degree  | 3060 | 34   |
| complete | 0 |               | 2180 | 32   |
| complete | 0 |               | 3130 | 35   |
| complete | 0 |               | 4260 | 36   |
| franck   | 0 |               | 3420 | 33   |
| complete | 0 |               | 2890 | 33.5 |
| franck   | 0 |               | 3070 | 33.5 |
| franck   | 0 |               | 2640 | 33.5 |
| franck   | 0 |               | 3520 | 35   |
| franck   | 0 |               | 2980 | 34.5 |
| franck   | 0 |               | 2960 | 35   |
| franck   | 0 |               | 3170 | 34   |
| complete | 0 |               | 3310 | 33   |
| franck   | 0 |               | 3400 | 34   |
| franck   | 0 |               | 3380 | 35   |
| complete | 0 |               | 3390 | 34   |
| complete | 0 |               | 2650 | 32   |
| franck   | 0 |               | 3110 | 34   |

|          |   |              |      |      |
|----------|---|--------------|------|------|
| franck   | 0 |              | 3000 | 33.5 |
| franck   | 0 |              | 3600 | 33.5 |
| complete | 0 |              | 2760 | 33   |
| franck   | 0 |              | 3590 | 35   |
| franck   | 0 | First degree | 2720 | 34   |

| 1  | Apgar score | bilical arterial | reterial lactate | Newborn transfer        | postpartum hemorrhage (ml) |
|----|-------------|------------------|------------------|-------------------------|----------------------------|
| 10 | 7.2         | NC               |                  |                         | 10                         |
| 4  | 6.99        | NC               |                  | onatal intensive care u | 100                        |
| 10 | 7.15        | NC               |                  |                         | 750                        |
| 10 | 7.14        | NC               |                  |                         | 50                         |
| 10 | 7.17        | NC               |                  |                         | 50                         |
| 10 | 6.82        | 6.25             |                  |                         | 200                        |
| 10 | 7.25        | NC               |                  |                         | 150                        |
| 10 | 7.12        | NC               |                  |                         | 100                        |
| 10 | 7.27        | NC               |                  |                         | 150                        |
| 10 | 7.31        | NC               |                  |                         | 100                        |
| 10 | 0           | NC               |                  |                         | 20                         |
| 10 | 7.14        | 7.21             |                  |                         | 100                        |
| 10 | 7.12        | 7.94             |                  |                         | 50                         |
| 10 | 7.33        | 3.2              |                  |                         | 50                         |
| 10 | 7.25        | 2.87             |                  |                         | 30                         |
| 10 | 7.05        | 11.4             |                  |                         | 200                        |
| 10 | 7.22        | 4.4              |                  |                         | 150                        |
| 10 | 7.12        | 6.85             |                  |                         | 50                         |
| 10 | 7.16        | 7.45             |                  |                         | 250                        |
| 10 | 7.33        | 2.02             |                  |                         | 800                        |
| 10 | 0           | 3.9              |                  |                         | 50                         |
| 10 | 7.12        | 9.5              |                  |                         | 100                        |
| 9  | 7.01        | 9.41             |                  | onatal intensive care u | 100                        |
| 10 | 7.15        | 7.5              |                  |                         | 250                        |
| 10 | 7.102       | 2.15             |                  |                         | 0                          |
| 10 | 7.12        | 5.2              |                  |                         | 300                        |
| 9  | 7.14        | 8.92             |                  |                         | 150                        |
| 10 | 7.15        | 4.84             |                  |                         | 250                        |
| 7  | 6.93        | 5.76             |                  | onatal intensive care u | 50                         |
| 10 | 7.22        | 5.63             |                  |                         | 50                         |
| 10 | 7.29        | 3                |                  |                         | 50                         |
| 10 | 7.24        | 3.61             |                  | neonatal unit           | 450                        |
| 10 | 7.29        | 3.11             |                  |                         | 250                        |
| 10 | 7.16        | 6.88             |                  |                         | 250                        |
| 10 | 7.19        | 8.72             |                  |                         | 50                         |
| 9  | 7.04        | 6.63             |                  |                         | 50                         |
| 10 | 7.09        | 7.64             |                  |                         | 100                        |
| 10 | 7.23        | 5.13             |                  |                         | 100                        |
| 10 | 7.16        | 7.16             |                  |                         | 300                        |
| 10 | 7.08        | 5                |                  |                         | 50                         |
| 10 | 0           | 5                |                  |                         | 100                        |
| 10 | 6.965       | 5.65             |                  |                         | 200                        |

|    |       |       |               |      |
|----|-------|-------|---------------|------|
| 10 | 7.22  | 7.64  |               | 50   |
| 10 | 7.29  | 6.19  |               | 100  |
| 9  | 7.046 | 10.78 |               | 100  |
| 10 | 7.29  | 2.89  |               | 400  |
| 10 | 0     | 5.2   |               | 50   |
| 10 | 7.26  | 2.68  |               | 100  |
| 10 | 7.08  | 7.8   |               | 50   |
| 10 | 7.33  | 3.85  |               | 350  |
| 10 | 7.25  | 3.15  |               | 150  |
| 10 | 7.32  | 3.28  |               | 100  |
| 9  | 7.03  | 5.91  | neonatal unit | 100  |
| 10 | 6.87  | 13    |               | 100  |
| 10 | 7.13  | 10    |               | 100  |
| 10 | 7.01  | 10    |               | 200  |
| 6  | 7.05  | 11    | neonatal unit | 1100 |
| 10 | 7.41  | 7.68  |               | 100  |
| 8  | 7.21  | 2.34  |               | 150  |
| 10 | 0     | 4     |               | 50   |
| 10 | 7.11  | 9.62  |               | 100  |
| 10 | 7.16  | 7.38  |               | 50   |
| 10 | 0     | 5.1   |               | 100  |
| 10 | 0     | 9.1   |               | 750  |
| 10 | 7.31  | 4.98  |               | 50   |
| 10 | 7.18  | 4.03  |               | 250  |
| 10 | 7.32  | 5.38  |               | 100  |
| 10 | 7.11  | 5     |               | 150  |
| 10 | 7.28  | 6.1   |               | 50   |
| 9  | 7.24  | 6.72  |               | 50   |
| 10 | 7.1   | 7.43  |               | 100  |
| 10 | 7.246 | 5.75  |               | 400  |
| 10 | 7.19  | 6.12  |               | 750  |
| 9  | 7.09  | 8.82  |               | 50   |
| 10 | 0     | 0     |               | 50   |
| 10 | 6.95  | 6.58  |               | 100  |
| 10 | 7.09  | 11.33 |               | 200  |
| 10 | 7.15  | 7.91  |               | 250  |
| 10 | 7.35  | 4.08  |               | 50   |
| 10 | 7.32  | 2.95  |               | 50   |
| 10 | 7.14  | 4.72  |               | 50   |
| 10 | 0     | 4.1   |               | 400  |
| 10 | 0     | 5.93  |               | 50   |
| 10 | 7.19  | 5.41  |               | 20   |
| 10 | 7.21  | 7.94  |               | 250  |

|    |       |       |               |     |
|----|-------|-------|---------------|-----|
| 9  | 6.81  | 13    |               | 50  |
| 10 | 0     | 3.6   |               | 200 |
| 10 | 7.14  | 6.39  |               | 300 |
| 10 | 7.27  | 2.8   |               | 150 |
| 10 | 0     | 3.98  |               | 300 |
| 10 | 7.19  | 3.63  |               | 150 |
| 10 | 7.24  | 3.46  |               | 50  |
| 10 | 7.17  | 6.16  |               | 100 |
| 10 | 6.84  | 7.06  |               | 50  |
| 10 | 7.23  | 4.76  |               | 150 |
| 10 | 7.24  | 3.93  |               | 50  |
| 10 | 7.22  | 3.98  |               | 50  |
| 10 | 7.29  | 5.66  |               | 250 |
| 10 | 7.26  | 2.51  |               | 200 |
| 10 | 6.86  | 8.48  |               | 50  |
| 10 | 7.27  | 2.95  |               | 50  |
| 8  | 6.9   | 6.7   |               | 50  |
| 10 | 7.13  | 6.2   |               | 100 |
| 10 | 7.16  | 6.59  |               | 150 |
| 9  | 6.96  | 6.48  |               | 350 |
| 10 | 7.24  | 3.23  |               | 100 |
| 10 | 7.09  | 7.44  |               | 50  |
| 10 | 7.34  | 3.21  |               | 100 |
| 10 | 7.07  | 6.85  |               | 50  |
| 10 | 7.17  | 7.05  |               | 200 |
| 10 | 0     | 5.8   |               | 100 |
| 10 | 7.323 | 1.93  |               | 50  |
| 10 | 7.11  | 6.8   |               | 50  |
| 10 | 7.19  | 5.76  |               | 100 |
| 10 | 7.04  | 11.94 |               | 100 |
| 10 | 6.99  | 9     | neonatal unit | 50  |
| 10 | 7.16  | 5.97  |               | 50  |
| 10 | 0     | 2.9   |               | 50  |
| 10 | 7.21  | 4.32  |               | 50  |
| 9  | 7.3   | 5.1   | neonatal unit | 50  |
| 10 | 0     | 3.8   |               | 450 |
| 9  | 0     | 4.6   |               | 300 |
| 10 | 7.17  | 5.06  |               | 100 |
| 9  | 7.053 | 8.37  |               | 150 |
| 10 | 7.023 | 8.43  |               | 50  |
| 10 | 7.31  | 3.06  |               | 50  |
| 8  | 7.12  | 6.7   |               | 150 |
| 9  | 7.185 | 3.75  |               | 50  |

|    |       |       |               |     |
|----|-------|-------|---------------|-----|
| 10 | 7.32  | 3.58  |               | 200 |
| 10 | 7.07  | 7.15  |               | 50  |
| 10 | 7.23  | 4.1   |               | 100 |
| 10 | 7.237 | 3.05  |               | 100 |
| 10 | 7.26  | 4.75  |               | 50  |
| 10 | 7.18  | 5.76  |               | 50  |
| 10 | 7.25  | 5.45  |               | 50  |
| 9  | 6.96  | 9.1   |               | 50  |
| 10 | 7.15  | 7.19  |               | 100 |
| 10 | 6.89  | 13.59 | neonatal unit | 200 |
| 10 | 7.18  | 6.42  |               | 100 |
| 10 | 7.1   | 4.5   |               | 70  |
| 10 | 7.21  | 6.46  |               | 50  |
| 10 | 7.09  | 7.77  |               | 100 |
| 10 | 0     | 5.8   |               | 150 |
| 9  | 6.94  | 10    |               | 50  |
| 10 | 7.24  | 3.66  |               | 200 |
| 10 | 7.29  | 2.49  |               | 50  |
| 10 | 0     | 4     |               | 100 |
| 10 | 7.19  | 4.56  |               | 800 |
| 10 | 6.87  | 12    |               | 150 |
| 10 | 7.21  | 3.29  |               | 250 |
| 10 | 7.06  | 9.24  |               | 250 |
| 10 | 0     | 4     |               | 500 |
| 8  | 7.18  | 4.71  |               | 250 |
| 10 | 7.07  | 8.45  |               | 50  |
| 10 | 7.13  | 6     |               | 50  |
| 10 | 0     | 5.2   |               | 50  |
| 10 | 7.04  | 8.89  |               | 50  |
| 10 | 0     | 6     |               | 50  |
| 10 | 7.32  | 3.28  |               | 300 |
| 9  | 6.99  | 9     |               | 50  |
| 10 | 7.2   | 2.92  |               | 50  |
| 7  | 7.33  | 3.42  |               | 200 |
| 9  | 7.03  | 8     |               | 50  |
| 10 | 7.25  | 3.7   |               | 400 |
| 10 | 7.04  | 9.66  |               | 100 |
| 10 | 7.35  | 3.9   |               | 100 |
| 10 | 7.01  | 8.38  |               | 20  |
| 10 | 7.33  | 3.31  |               | 300 |
| 10 | 7.22  | 3.53  |               | 100 |
| 10 | 7.05  | 8.54  |               | 100 |
| 10 | 7.14  | 5.54  |               | 50  |

|    |       |       |     |
|----|-------|-------|-----|
| 10 | 7.011 | 7     | 50  |
| 10 | 7.3   | 2.72  | 50  |
| 9  | 7.2   | 6.69  | 50  |
| 10 | 7.35  | 1.73  | 350 |
| 10 | 6.93  | 9.82  | 50  |
| 10 | 7.37  | 4.15  | 200 |
| 10 | 7.08  | 11.19 | 150 |
| 10 | 7.22  | 7.22  | 150 |
| 10 | 7.29  | 3.52  | 50  |
| 10 | 7.13  | 7.06  | 100 |
| 10 | 7.11  | 7.39  | 200 |
| 10 | 7.1   | 6.32  | 50  |
| 10 | 7.08  | 8.24  | 50  |
| 10 | 7.133 | 6.92  | 50  |
| 10 | 7.17  | 5.6   | 200 |
| 10 | 7.01  | 10.2  | 800 |
| 10 | 7.22  | 4.65  | 150 |
| 10 | 7.22  | 5.09  | 50  |
| 10 | 7.23  | 6.66  | 50  |
| 10 | 7     | 8.5   | 50  |
| 10 | 7.02  | 7.27  | 50  |
| 10 | 7.31  | 4.17  | 50  |
| 10 | 7.16  | 5.78  | 500 |
| 10 | 7.33  | 3.26  | 100 |
| 10 | 7.21  | 3.02  | 50  |
| 9  | 7.02  | 7.79  | 200 |
| 10 | 7.15  | 5.77  | 150 |
| 10 | 7.19  | 5.91  | 20  |
| 10 | 7.29  | 2.11  | 50  |
| 10 | 7.01  | 6.68  | 50  |
| 10 | 7.32  | 3.9   | 200 |
| 10 | 7.198 | 3.31  | 150 |
| 10 | 7.23  | 5     | 20  |
| 10 | 7.13  | 4.75  | 50  |
| 10 | 7.17  | 4.9   | 50  |
| 10 | 7.24  | 2.33  | 25  |
| 10 | 7.2   | 5.96  | 250 |
| 10 | 0     | 3.7   | 400 |
| 9  | 6.98  | 10.6  | 250 |
| 10 | 6.86  | 5.58  | 150 |
| 10 | 7.18  | 7.27  | 100 |
| 10 | 7.21  | 5.19  | 350 |
| 10 | 7.1   | 6.2   | 50  |

|    |       |       |     |
|----|-------|-------|-----|
| 10 | 7.37  | 3.18  | 50  |
| 10 | 7.13  | 5.02  | 450 |
| 10 | 7.03  | 7.9   | 100 |
| 10 | 7.05  | 6.58  | 150 |
| 9  | 7.08  | 6.5   | 200 |
| 10 | 7.27  | 4.25  | 400 |
| 10 | 6.99  | 8.11  | 50  |
| 10 | 7.31  | 3.29  | 50  |
| 8  | 6.86  | 5.89  | 150 |
| 10 | 6.97  | 8.24  | 50  |
| 10 | 7.05  | 9.37  | 50  |
| 10 | 7.23  | 3.48  | 200 |
| 10 | 7.28  | 3.91  | 50  |
| 10 | 7.22  | 3.33  | 100 |
| 10 | 7.08  | 6.92  | 50  |
| 10 | 7.23  | 4.35  | 200 |
| 10 | 7.19  | 3.33  | 50  |
| 9  | 7.07  | 8.56  | 50  |
| 10 | 7.2   | 8.38  | 50  |
| 9  | 7.14  | 4.84  | 50  |
| 10 | nc    | 3.43  | 50  |
| 10 | 7.01  | 9.85  | 150 |
| 10 | 7.18  | 4.73  | 150 |
| 10 | 7.08  | 6.89  | 50  |
| 10 | 7.21  | 4.6   | 100 |
| 10 | 7.03  | 6.85  | 200 |
| 10 | 7.18  | 3.5   | 100 |
| 10 | 7.26  | 2.16  | 50  |
| 10 | 7.19  | 4.9   | 150 |
| 9  | 7.28  | 2.06  | 200 |
| 10 | 7.18  | 3.64  | 150 |
| 10 | 7.1   | 5.97  | 200 |
| 8  | 6.84  | 6.17  | 50  |
| 10 | 7.15  | 6.87  | 50  |
| 9  | 7.085 | 5.78  | 50  |
| 10 | 7.17  | 5.91  | 50  |
| 10 | 7.32  | 1.92  | 200 |
| 10 | 7.01  | 11.58 | 250 |
| 10 | 6.93  | 11.18 | 50  |
| 10 | 7.06  | 7.13  | 350 |
| 10 | 7.06  | 7.05  | 500 |
| 10 | 7.09  | 8.56  | 50  |
| 10 | 7.3   | 4.14  | 50  |



|    |       |       |                         |     |
|----|-------|-------|-------------------------|-----|
| 10 | 7.11  | 8.34  |                         | 50  |
| 10 | 7.072 | 9.69  |                         | 50  |
| 10 | 7.13  | 5.2   |                         | 250 |
| 10 | 7.18  | 2.77  |                         | 50  |
| 10 | nc    | 5.3   |                         | 600 |
| 7  | 7.01  | 8.75  |                         | 100 |
| 10 | 7.19  | 6.25  |                         | 300 |
| 10 | 7.04  | 7.66  |                         | 50  |
| 6  | 6.8   | 10.9  |                         | 50  |
| 10 | 7.19  | 5.12  |                         | 50  |
| 10 | 7.187 | 5.29  |                         | 100 |
| 10 | 7.09  | 6.17  |                         | 50  |
| 6  | 7.005 | 10.27 |                         | 800 |
| 9  | 7.09  | 6.74  |                         | 100 |
| 10 | 7.08  | 6.81  |                         | 50  |
| 10 | 0     | 5.6   |                         | 40  |
| 10 | 0     | 5.6   |                         | 50  |
| 10 | 7.3   | 2.89  |                         | 50  |
| 10 | 7.042 | 7.87  |                         | 200 |
| 10 | 7.176 | 5.86  |                         | 100 |
| 10 | 7.11  | 5.96  |                         | 50  |
| 10 | 7.12  | 6.79  |                         | 50  |
| 9  | 7.23  | 6.54  |                         | 100 |
| 10 | 7.35  | 2.68  |                         | 50  |
| 6  | 7.21  | 4.24  | onatal intensive care u | 750 |
| 10 | 7.024 | 7.44  |                         | 50  |
| 10 | 7.14  | 6.02  |                         | 50  |
| 10 | 7.14  | 6.11  |                         | 150 |
| 9  | 7.18  | 6.36  |                         | 250 |
| 10 | 7.24  | 3.57  |                         | 100 |
| 8  | 7.2   | 8.42  |                         | 50  |
| 10 | 7.231 | 3.25  |                         | 25  |
| 9  | 7.17  | 5     |                         | 50  |
| 10 | 7.24  | 2.73  |                         | 150 |
| 10 | 7.16  | 4.56  |                         | 50  |
| 10 | 7.146 | 6.59  |                         | 100 |
| 8  | 7     | 7.9   |                         | 50  |
| 7  | 7.31  | 5.7   |                         | 150 |
| 10 | 7.25  | 5     |                         | 50  |
| 10 | 7.14  | 7.2   |                         | 50  |
| 10 | 7.2   | 5.9   |                         | 50  |
| 10 | 7.08  | 8.4   |                         | 350 |
| 10 | 7.11  | 5.5   |                         | 50  |

|    |       |     |               |      |
|----|-------|-----|---------------|------|
| 10 | 7.13  | 7.2 |               | 100  |
| 10 | 7.1   | 8.2 | neonatal unit | 50   |
| 10 | 7.08  | 6.2 |               | 1400 |
| 10 | 7.2   | 4   |               | 50   |
| 10 | 7.29  | 5.8 |               | 50   |
| 10 | 7.25  | 2.8 |               | 600  |
| 10 | 0     | 0   |               | 50   |
| 10 | 7.22  | 6.8 |               | 200  |
| 10 | 7.21  | 3.9 |               | 50   |
| 10 | 7.34  | 2.6 |               | 100  |
| 10 | 7.08  | 7.3 |               | 100  |
| 10 | 7.14  | 6.8 |               | 50   |
| 10 | 7.01  | 9.4 |               | 50   |
| 10 | 7.17  | 4.7 |               | 150  |
| 10 | 7.29  | 4.1 |               | 150  |
| 10 | 7.24  | 3.5 |               | 300  |
| 10 | 7.24  | 4.1 |               | 50   |
| 10 | 7.24  | 2.1 |               | 50   |
| 10 | 7     | 9.1 |               | 150  |
| 10 | 7.05  | 7.7 |               | 150  |
| 10 | 7.07  | 6.8 |               | 50   |
| 10 | 7.24  | 5   |               | 50   |
| 10 | 7.28  | 3.8 |               | 50   |
| 10 | 7.22  | 2.1 |               | 50   |
| 10 | 7.18  | 4.8 |               | 50   |
| 10 | 7.17  | 5.9 |               | 550  |
| 10 | 7.25  | 4.4 |               | 50   |
| 10 | 7.21  | 5.1 |               | 50   |
| 10 | 6.93  | 9   |               | 900  |
| 10 | 7.03  | 8.4 |               | 100  |
| 9  | 7     | 9.8 |               | 50   |
| 10 | 7.156 | 7   |               | 600  |
| 8  | 7.15  | 6.2 |               | 50   |
| 10 | 7.18  | 4.4 |               | 50   |
| 10 | 7.12  | 4.9 |               | 200  |
| 10 | 7.23  | 3.7 |               | 650  |
| 9  | 7.2   | 7.5 |               | 600  |
| 10 | 7.12  | 7.8 |               | 150  |
| 10 | 7.16  | 5.7 |               | 100  |
| 10 | 6.98  | 9.5 |               | 50   |
| 10 | 7.14  | 5.9 |               | 100  |
| 10 | 7.02  | 7.4 |               | 50   |
| 10 | 6.97  | 7.3 |               | 50   |

|    |      |     |      |
|----|------|-----|------|
| 10 | 7.25 | 2.6 | 50   |
| 10 | 7.09 | 4.8 | 1250 |
| 10 | 7.31 | 2.6 | 50   |
| 10 | 7.26 | 3.1 | 200  |
| 10 | 7.14 | 4.4 | 100  |
